# Supplementary material for: Simultaneous Determination of 108 Pesticide Residues in Three Traditional Chinese Medicines Using a Modified QuEChERS Mixed Sample Preparation Method and HPLC-MS/MS
Source: MDPI journal article supplement (doi:10.3390/molecules27217636), 2022-11-07
Supplement: s1 [file s1]

## Supplemental materials

# Simultaneous Determination of 108 Pesticide Residues in Three Traditional Chinese Medicines Using a Modified QuEChERS Mixed Sample Preparation Method and HPLC-MS/MS

Xuyan Fan <sup>1,2</sup>, Tao Tang <sup>2</sup>, Song Du <sup>1,2</sup>, Ningning Sang <sup>2</sup>, Hao Huang <sup>2</sup>, Chenghui Zhang <sup>1,3,\*</sup> and Xueping Zhao <sup>2,\*</sup>

<sup>1</sup> College of Food Science and Engineering, Hainan University, Haikou 570228, China

<sup>2</sup> State Key Laboratory for Managing Biotic and Chemical Threats to the Quality and Safety of Agro-Products, Key Laboratory of Detection for Pesticide Residues and Control of Zhejiang, Institute of Agro-Product Safety and Nutrition, Zhejiang Academy of Agricultural Sciences, Hangzhou 310021, China

<sup>3</sup> Key Laboratory of Tropical Fruits and Vegetables Quality and Safety for State Market Regulation, Haikou 570206, China

\* Correspondence: zchlm@hainanu.edu.cn (C.Z.); zhaoxueping@tom.com (X.Z.); Tel.: +86-571-85273092 (X.Z.)

**Table S1.** Parameters of 108 pesticides determined by HPLC-MS/MS.

| No. | Pesticides                | Retention<br>Time<br>(min) | Parent<br>ion<br>(m/z) | Daughter<br>ion 1<br>(m/z) | CE 1<br>(eV) | Daughter<br>ion 2<br>(m/z) | CE 1<br>(eV) |
|-----|---------------------------|----------------------------|------------------------|----------------------------|--------------|----------------------------|--------------|
| 1   | Betaine                   | 1.344                      | 118.2                  | 58.15                      | -30          | 59.15                      | -19          |
| 2   | Acephate                  | 3.502                      | 184.2                  | 143.0                      | -8           | 95.0                       | -23          |
| 3   | Omethoate                 | 3.894                      | 214.1                  | 183.0                      | -10          | 155.0                      | -14          |
| 4   | 3-Indoleacetic acid       | 5.723                      | 176.1                  | 130.2                      | -15          | 103.2                      | -32          |
| 5   | Aldicarb sulfoxide        | 4.209                      | 207.1                  | 89.0                       | -14          | 132.0                      | -8           |
| 6   | Dinotefuran               | 4.189                      | 203.1                  | 129.1                      | -12          | 113.1                      | -22          |
| 7   | Propamocarb               | 4.43                       | 189.2                  | 144.05                     | -20          | 102.5                      | -12          |
| 8   | Aldicarb sulfone          | 4.588                      | 240.1                  | 223.0                      | -21          | 86.0                       | -8           |
| 9   | Methomyl                  | 5.169                      | 163.05                 | 88.0                       | -8           | 106.05                     | -10          |
| 10  | Deisopropylatrazine       | 6.047                      | 173.7                  | 68.1                       | -26          | 104.15                     | -23          |
| 11  | Thiamethoxam              | 5.403                      | 292.0                  | 211.1                      | -11          | 181.1                      | -23          |
| 12  | Gibberellic acid          | 5.623                      | 345.15                 | 143.1                      | 30           | 221.15                     | 24           |
| 13  | Abscisic Acid             | 7.311                      | 263.1                  | 153.2                      | 10           | 204.1                      | 17           |
| 14  | Pyrazosulfuron-Ethyl      | 8.907                      | 415.1                  | 182.05                     | -18          | 139.05                     | -42          |
| 15  | Cycloxaprid               | 6.014                      | 323.1                  | 126.05                     | -34          | 277.1                      | -14          |
| 16  | Clothianidin              | 6.377                      | 250.0                  | 131.85                     | -10          | 169.0                      | -14          |
| 17  | Imidacloprid              | 6.278                      | 256.05                 | 175.1                      | -17          | 209.05                     | -14          |
| 18  | Trichlorfon               | 6.847                      | 256.9                  | 108.95                     | -17          | 220.85                     | -10          |
| 19  | 3-Hydroxycarbofuran       | 6.797                      | 238.1                  | 163.1                      | -14          | 181.2                      | -10          |
| 20  | 6-Kinetin                 | 7.005                      | 216.0                  | 81.1                       | -22          | 148.1                      | -13          |
| 21  | Sodium 5-Nitroguaiacolate | 7.291                      | 167.9                  | 153.1                      | 16           | 123.2                      | 21           |
| 22  | Sodium 2-Nitrophenolate   | 7.344                      | 138.15                 | 108.1                      | 19           | 92.1                       | 21           |
| 23  | Sodium 4-Nitrophenolate   | 7.338                      | 138.15                 | 108.1                      | 19           | 92.0                       | 24           |
| 24  | 2,4-D                     | 8.054                      | 219.0                  | 161.1                      | 13           | 125.0                      | 25           |
| 25  | Dimethoate                | 6.793                      | 230.0                  | 198.95                     | -9           | 125.0                      | -22          |
| 26  | Acetamiprid               | 6.796                      | 223.1                  | 126.05                     | -22          | 56.1                       | -15          |
| 27  | Carbendazim               | 7.323                      | 192.05                 | 160.05                     | -17          | 132.05                     | -30          |
| 28  | Thiacloprid               | 7.273                      | 253.0                  | 126.05                     | -20          | 99.0                       | -43          |
| 29  | Trinexapac-Ethyl          | 8.787                      | 253.1                  | 69.1                       | -23          | 207.1                      | -12          |
| 30  | Tricyclazole              | 7.578                      | 190.0                  | 136.0                      | -26          | 163.0                      | -21          |
| 31  | Indolbutyric Acid         | 8.074                      | 204.2                  | 186.25                     | -13          | 130.3                      | -14          |
| 32  | 6-Benzylaminopurine       | 8.343                      | 226.0                  | 91.1                       | -30          | 65.2                       | -52          |
| 33  | Thidiazuron               | 8.844                      | 221.1                  | 102.1                      | -16          | 128.0                      | -15          |
| 34  | Dichlorvos                | 8.863                      | 221.0                  | 109.1                      | -16          | 79.1                       | -27          |
| 35  | Carbofuran                | 8.966                      | 222.1                  | 123.1                      | -11          | 165.1                      | -21          |
| 36  | Carbaryl                  | 9.385                      | 202.05                 | 145.05                     | -9           | 127.05                     | -27          |
| 37  | Pirimicarb                | 10.015                     | 239.15                 | 72.05                      | -25          | 182.15                     | -19          |
| 38  | Forchlorfenuron           | 10.501                     | 248.1                  | 129.1                      | -17          | 93.1                       | -22          |
| 39  | RH-5849                   | 9.812                      | 295.1                  | 121.1                      | 18           | 77.25                      | 32           |

|    |                               |        |        |        |     |        |     |
|----|-------------------------------|--------|--------|--------|-----|--------|-----|
| 40 | Isopropyl                     | 10.319 | 194.1  | 95.0   | -14 | 137.1  | -17 |
| 41 | Atrazine                      | 10.319 | 216.1  | 174.05 | -17 | 96.05  | -25 |
| 42 | Imidan                        | 11.065 | 318.0  | 160.0  | -13 | 77.1   | -54 |
| 43 | Chlorantraniliprole           | 10.942 | 484.0  | 452.9  | -19 | 285.85 | -16 |
| 44 | Clomazone                     | 11.205 | 240.1  | 125.0  | -19 | 89.1   | -50 |
| 45 | Azoxystrobin                  | 11.336 | 404.1  | 372.05 | -14 | 329.0  | -31 |
| 46 | Methyl Jasmonate              | 11.573 | 225.2  | 133.2  | -12 | 151.2  | -14 |
| 47 | Pyrimethanil                  | 11.735 | 200.1  | 107.0  | -25 | 168.1  | -29 |
| 48 | Fenamidone                    | 11.756 | 312.1  | 92.05  | -15 | 236.1  | -24 |
| 49 | Boscalid                      | 11.893 | 343.0  | 307.1  | -18 | 271.1  | -30 |
| 50 | Dimethomorph                  | 12.177 | 388.1  | 301.0  | -20 | 165.05 | -34 |
| 51 | Mandipropamid                 | 11.918 | 412.1  | 328.05 | -12 | 124.95 | -30 |
| 52 | Isoprothiolane                | 12.107 | 291.1  | 231.1  | -11 | 189.1  | -21 |
| 53 | Fluopicolide                  | 12.188 | 382.9  | 172.95 | -22 | 145.0  | -47 |
| 54 | Paclobutrazol                 | 12.068 | 294.1  | 70.5   | -21 | 125.05 | -40 |
| 55 | Uniconazole                   | 12.712 | 292.1  | 70.1   | -24 | 125.0  | -28 |
| 56 | Malathion                     | 12.107 | 331.0  | 99.0   | -12 | 127.05 | -23 |
| 57 | Orysastrobin                  | 12.172 | 392.10 | 205.1  | -18 | 116.1  | -28 |
| 58 | Benthiavalicarb-<br>Isopropyl | 12.189 | 382.1  | 180.1  | -31 | 116.1  | -20 |
| 59 | Methoxyfenozide               | 12.184 | 369.2  | 149.1  | -16 | 313.1  | -8  |
| 60 | Triadimefon                   | 12.318 | 294.1  | 69.15  | -22 | 197.05 | -15 |
| 61 | Tiadinil                      | 12.53  | 265.8  | 71.0   | 16  | 238.0  | 12  |
| 62 | Cyproconazole                 | 12.717 | 292.1  | 70.05  | -20 | 125.05 | -30 |
| 63 | Triazophos                    | 12.508 | 314.05 | 162.15 | -19 | 119.15 | -35 |
| 64 | Fenhexamid                    | 12.803 | 301.9  | 97.1   | -52 | 55.1   | -26 |
| 65 | Chromafenozide                | 12.625 | 395.3  | 175.1  | -16 | 339.15 | -7  |
| 66 | Tetrachlorantraniliprole      | 12.801 | 539.5  | 319.9  | -17 | 508.3  | -15 |
| 67 | Spirotetramat                 | 12.684 | 374.15 | 302.1  | -16 | 330.2  | -15 |
| 68 | Epoxiconazole                 | 12.962 | 330.1  | 121.2  | -21 | 141.1  | -18 |
| 69 | Furan Tebufenozide            | 12.644 | 395.0  | 175.0  | -35 | 339.0  | -20 |
| 70 | Diclocymet                    | 13.014 | 311.0  | 96.0   | 17  | 80.1   | 34  |
| 71 | Alachlor                      | 13.081 | 270.1  | 238.05 | -10 | 162.15 | -19 |
| 72 | Tetraconazole                 | 12.978 | 372.0  | 129.05 | -31 | 70.2   | -24 |
| 73 | Cyazofamid                    | 13.041 | 325.0  | 108.05 | -12 | 261.1  | -10 |
| 74 | Fenoxanil                     | 13.471 | 329.1  | 302.1  | -12 | 86.1   | -22 |
| 75 | Picoxystrobin                 | 13.427 | 368.2  | 144.95 | -21 | 205.15 | -9  |
| 76 | Flusilazole                   | 13.394 | 316.1  | 165.1  | -18 | 247.1  | -29 |
| 77 | Kresoxim-Methyl               | 13.665 | 314.1  | 225.15 | -16 | 235.15 | -16 |
| 78 | Fipronil                      | 13.449 | 435.0  | 330.0  | 16  | 250.0  | 28  |
| 79 | Diazinon                      | 14.036 | 305.0  | 169.1  | -19 | 153.1  | -20 |
| 80 | Brassinolide                  | 14.143 | 481.3  | 445.4  | -14 | 315.3  | -16 |
| 81 | Tebuconazole                  | 13.881 | 308.1  | 70.1   | -22 | 125.0  | -38 |
| 82 | Pentrimazole                  | 13.834 | 284.1  | 70.0   | -27 | 159.0  | -17 |

|     |                    |        |        |        |     |        |     |
|-----|--------------------|--------|--------|--------|-----|--------|-----|
| 83  | Pythiamin          | 13.818 | 360.0  | 276.0  | -15 | 177.0  | -34 |
| 84  | Propiconazole      | 14.052 | 342.05 | 159.1  | -30 | 205.1  | -18 |
| 85  | Pyraoxystrobin     | 14.207 | 413.1  | 205.1  | -18 | 145.0  | -10 |
| 86  | Pyraclostrobin     | 14.191 | 387.8  | 162.9  | -13 | 193.7  | -23 |
| 87  | Phoxim             | 14.227 | 299.0  | 77.1   | -26 | 129.1  | -10 |
| 88  | Cyflufenamid       | 14.361 | 413.2  | 295.05 | -16 | 203.0  | -40 |
| 89  | Diniconazole       | 14.733 | 326.1  | 70.0   | -25 | 159.0  | -30 |
| 90  | Ametoctradin       | 14.908 | 276.2  | 149.0  | -35 | 176.1  | -35 |
| 91  | Indoxacarb         | 14.864 | 528.1  | 249.1  | -17 | 292.95 | -15 |
| 92  | Pretilachlor       | 15.148 | 312.2  | 252.15 | -16 | 176.15 | -28 |
| 93  | Difenoconazole     | 14.794 | 406.1  | 251.0  | -25 | 337.05 | -17 |
| 94  | Trifloxystrobin    | 14.943 | 409.1  | 186.05 | -18 | 145.0  | -44 |
| 95  | Profenofos         | 15.442 | 372.9  | 302.8  | -19 | 345.0  | -12 |
| 96  | Enestroburin       | 15.551 | 100.1  | 137.0  | -25 | 178.0  | -15 |
| 97  | Coumoxystrobin     | 15.756 | 437.1  | 145.1  | -35 | 205.1  | -10 |
| 98  | Buprofezin         | 15.805 | 306.1  | 201.1  | -11 | 116.1  | -16 |
| 99  | Emamectin Benzoate | 16.566 | 886.6  | 158.15 | -40 | 126.3  | -40 |
| 100 | Fenpropathrin      | 16.219 | 350.3  | 97.2   | -18 | 125.2  | -31 |
| 101 | Chlorpyrifos       | 16.213 | 351.9  | 199.9  | -18 | 96.95  | -33 |
| 102 | Hexythiazox        | 16.215 | 353.1  | 228.0  | -15 | 168.05 | -25 |
| 103 | Propargite         | 16.524 | 368.2  | 231.2  | -11 | 175.15 | -17 |
| 104 | Spirodiclofen      | 16.796 | 411.1  | 71.2   | -16 | 313.05 | -11 |
| 105 | Pyridaben          | 17.28  | 365.1  | 147.1  | -12 | 309.05 | -25 |
| 106 | Carbosulfan        | 18.042 | 381.2  | 118.1  | -19 | 160.1  | -14 |
| 107 | Etofenprox         | 18.441 | 394.0  | 177.1  | -17 | 106.95 | -40 |
| 108 | Bifenthrin         | 18.754 | 440.3  | 181.1  | -21 | 166.2  | -43 |

**Table S2.** Sets of experiments of different dosages of sorbents.

| Group | Sorbents                                                | Outer diameter | Length               |
|-------|---------------------------------------------------------|----------------|----------------------|
| 1     | 10 mg MWCNT(short) + 150 mg MgSO <sub>4</sub>           | OD: 20 - 30 nm | L: 0.5 - 2 $\mu$ m   |
| 2     | 10 mg MWCNT(short) + 50 mg MgSO <sub>4</sub>            | OD: 10 - 20 nm | L: 0.5 - 2 $\mu$ m   |
| 3     | 10 mg MWCNT(long) + 150 mg MgSO <sub>4</sub>            | OD: 10 - 20 nm | L: 10 - 30 $\mu$ m   |
| 4     | 10 mg g-MWCNTs + 150 mg MgSO <sub>4</sub>               | OD: 10 - 20 nm | L: 5 - 30 $\mu$ m    |
| 5     | 10 mg g-MWCNTs + 150 mg MgSO <sub>4</sub>               | OD: 30 - 50 nm | L: 10 - 20 $\mu$ m   |
| 6     | 10 mg MWCNTs-COOH + 150 mg MgSO <sub>4</sub>            | OD: 30 - 50 nm | L: 10 - 20 $\mu$ m   |
| 7     | 10 mg MWCNTs-NH <sub>2</sub> + 150 mg MgSO <sub>4</sub> | OD: 30 - 50 nm | L: 10 - 20 $\mu$ m   |
| 8     | 10 mg MWCNTs-OH + 150 mg MgSO <sub>4</sub>              | OD: 8 - 15 nm  | L: $\sim$ 50 $\mu$ m |
| 9     | 10 mg C18 + 150 mg MgSO <sub>4</sub>                    |                |                      |
| 10    | 50 mg PSA + 150 mg MgSO <sub>4</sub>                    |                |                      |
| 11    | 50 mg PSA + 50 mg C18+150 mg MgSO <sub>4</sub>          |                |                      |
| 12    | 10 mg ZrO <sub>2</sub> + 150 mg MgSO <sub>4</sub>       |                |                      |

**Table S3.** Calibration curves, correlation coefficients ( $R^2$ ), limit of detection (LOD), limit of quantification (LOQ), and matrix effects for each target pesticide in *Fritillaria thunbergii* Miq.

| No. | Pesticide            | Calibration curves | $R^2$  | LOD<br>( $\mu\text{g/kg}$ ) | LOQ<br>( $\mu\text{g/kg}$ ) | ME<br>(%) |
|-----|----------------------|--------------------|--------|-----------------------------|-----------------------------|-----------|
| 1   | Betaine              | $y=14468x+24362$   | 0.9997 | 0.33                        | 1.11                        | 198.65    |
| 2   | Acephate             | $y=34023x+7615.2$  | 0.9998 | 0.40                        | 1.32                        | 200.08    |
| 3   | Omethoate            | $y=47297x-16876$   | 0.9997 | 0.73                        | 2.42                        | 164.55    |
| 4   | 3-Indoleacetic acid  | $y=13594x-10839$   | 0.9995 | 0.11                        | 0.37                        | 37.13     |
| 5   | Aldicarb sulfoxide   | $y=12203x-1129.3$  | 0.9997 | 0.38                        | 1.25                        | 12.29     |
| 6   | Dinotefuran          | $y=16697x+32608$   | 0.9994 | 0.49                        | 1.65                        | 9.8       |
| 7   | Propamocarb          | $y=16551x-13730$   | 0.9995 | 0.10                        | 1.33                        | -15.72    |
| 8   | Aldicarb sulfone     | $y=41309x+33389$   | 0.9999 | 0.47                        | 1.57                        | 3.12      |
| 9   | Methomyl             | $y=13935x+1770.8$  | 0.9999 | 0.17                        | 0.56                        | -100      |
| 10  | Deisopropylatrazine  | $y=6854.6x+19245$  | 0.9989 | 0.53                        | 1.76                        | 49.06     |
| 11  | Thiamethoxam         | $y=42520x+51991$   | 0.9995 | 0.26                        | 0.88                        | 11.11     |
| 12  | Gibberellic acid     | $y=974.34x-850.04$ | 0.9992 | 1.98                        | 6.61                        | -22.15    |
| 13  | Abscisic Acid        | $y=2233.6x-2163.5$ | 0.9996 | 0.15                        | 0.51                        | -13.96    |
| 14  | Pyrazosulfuron-Ethyl | $y=17501x-13369$   | 0.9994 | 0.16                        | 0.52                        | 34.99     |
| 15  | Cycloxaprid          | $y=23808x+12288$   | 1      | 0.22                        | 0.73                        | -7.75     |
| 16  | Clothianidin         | $y=11914x+3826.4$  | 0.9994 | 0.38                        | 1.26                        | 40.25     |
| 17  | Imidacloprid         | $y=22255x-3224.9$  | 0.9992 | 0.93                        | 3.09                        | 77.95     |
| 18  | Trichlorfon          | $y=14281x+28320$   | 0.9992 | 0.60                        | 1.99                        | 92.80     |
| 19  | 3-Hydroxycarbofuran  | $y=9956x+18768$    | 0.9992 | 0.84                        | 2.82                        | 151.36    |
| 20  | 6-Kinetin            | $y=92056x+38924$   | 0.9995 | 1.29                        | 4.29                        | 130.56    |

|    |                           |                    |        |      |      |         |
|----|---------------------------|--------------------|--------|------|------|---------|
| 21 | Sodium 5-Nitroguaiacolate | $y=1545.3x+1351.7$ | 0.9997 | 1.10 | 3.65 | -3.74   |
| 22 | Sodium 2-Nitrophenolate   | $y=4453.5x+10613$  | 0.9999 | 0.42 | 1.39 | 17.13   |
| 23 | Sodium 4-Nitrophenolate   | $y=8200.8x+21079$  | 0.9995 | 0.36 | 1.21 | 22.22   |
| 24 | 2,4-D                     | $y=1812.3x-2864.4$ | 0.9997 | 0.48 | 1.59 | -50.67  |
| 25 | Dimethoate                | $y=48961x+85638$   | 0.9993 | 0.18 | 0.59 | 155.82  |
| 26 | Acetamiprid               | $y=56755x+108562$  | 0.9993 | 0.15 | 0.50 | 132.05  |
| 27 | Carbendazim               | $y=139898x+38035$  | 0.9999 | 0.17 | 0.58 | 165.93  |
| 28 | Thiacloprid               | $y=96867x+183064$  | 0.9993 | 0.18 | 0.61 | 142.93  |
| 29 | Trinexapac-Ethyl          | $y=10889x+8364.3$  | 0.9998 | 1.04 | 3.45 | 163.84  |
| 30 | Tricyclazole              | $y=51689x+4964.5$  | 0.9994 | 0.55 | 1.85 | -100.00 |
| 31 | Indolbutyric Acid         | $y=6887.5x-2672.2$ | 0.9999 | 1.33 | 4.43 | -100.00 |
| 32 | 6-Benzylaminopurine       | $y=133006x+40644$  | 0.9995 | 0.59 | 1.98 | 281.17  |
| 33 | Thidiazuron               | $y=17906x-3955.9$  | 0.9998 | 0.23 | 0.76 | 8.04    |
| 34 | Dichlorvos                | $y=39787x+2562.2$  | 0.9999 | 0.30 | 1.01 | 37.68   |
| 35 | Carbofuran                | $y=130099x-26323$  | 0.9999 | 0.11 | 0.38 | 69.61   |
| 36 | Carbaryl                  | $y=33092x-8776.1$  | 0.9998 | 0.24 | 0.78 | 546.23  |
| 37 | Pirimicarb                | $y=138229x-26643$  | 0.9998 | 0.11 | 0.36 | 27.87   |
| 38 | Forchlorfenuron           | $y=38305x-9752.6$  | 0.9997 | 0.29 | 0.98 | 23.31   |
| 39 | RH-5849                   | $y=23292x+30796$   | 0.9991 | 0.18 | 0.59 | 38.13   |
| 40 | Isopropyl                 | $y=94431x+24479$   | 0.9999 | 0.23 | 0.76 | 26.65   |
| 41 | Atrazine                  | $y=51461x+50072$   | 0.9995 | 0.29 | 0.95 | 18.56   |
| 42 | Imidan                    | $y=98202x-9327.4$  | 1      | 0.12 | 0.39 | -21.55  |
| 43 | Chlorantraniliprole       | $y=22285x+4982.3$  | 0.9999 | 0.21 | 0.71 | 11.81   |
| 44 | Clomazone                 | $y=216809x-179760$ | 0.9995 | 0.18 | 0.59 | 24.76   |
| 45 | Azoxystrobin              | $y=353301x-366207$ | 0.9999 | 0.34 | 1.13 | 77.94   |
| 46 | Methyl Jasmonate          | $y=15695x+4115.7$  | 0.9998 | 0.58 | 1.93 | 16.45   |

|    |                           |                    |        |      |      |        |
|----|---------------------------|--------------------|--------|------|------|--------|
| 47 | Pyrimethanil              | $y=26105x-11245$   | 0.9997 | 0.19 | 0.64 | 18.18  |
| 48 | Fenamidone                | $y=63277x-22054$   | 0.9997 | 0.25 | 0.83 | -12.46 |
| 49 | Boscalid                  | $y=43899x+14528$   | 0.9998 | 0.87 | 2.91 | 3.70   |
| 50 | Dimethomorph              | $y=63461x+32882$   | 0.9997 | 0.38 | 1.27 | -14.62 |
| 51 | Mandipropamid             | $y=162904x-148884$ | 0.9996 | 0.22 | 0.72 | -0.70  |
| 52 | Isoprothiolane            | $y=228197x+18351$  | 0.9999 | 0.18 | 0.61 | 26.62  |
| 53 | Fluopicolide              | $y=64493x+61888$   | 0.9995 | 0.15 | 0.49 | 12.23  |
| 54 | Paclobutrazol             | $y=37679x+56533$   | 0.9994 | 0.78 | 2.59 | -3.53  |
| 55 | Uniconazole               | $y=26410x+33743$   | 0.9996 | 0.38 | 1.27 | -0.96  |
| 56 | Malathion                 | $y=81948x+702195$  | 0.9992 | 0.37 | 1.23 | 11.76  |
| 57 | Orysastrobina             | $y=199043x-176598$ | 0.9995 | 0.17 | 0.56 | 0.07   |
| 58 | Benthiavalicarb-Isopropyl | $y=76225x+42575$   | 0.9995 | 0.39 | 1.31 | -6.82  |
| 59 | Methoxyfenozide           | $y=35307x+37728$   | 0.9999 | 0.94 | 3.14 | 12.65  |
| 60 | Triadimefon               | $y=38788x+9201.3$  | 0.9999 | 0.87 | 2.89 | 1.24   |
| 61 | Tiadinil                  | $y=10779x+8399.6$  | 0.996  | 0.15 | 0.51 | -7.64  |
| 62 | Cyproconazole             | $y=19663x++22588$  | 0.9994 | 0.22 | 0.74 | 2.19   |
| 63 | Triazophos                | $y=404253x-433594$ | 0.9995 | 1.00 | 3.32 | 1.40   |
| 64 | Fenhexamid                | $y=23504x-9706.8$  | 0.9997 | 0.24 | 0.78 | -10.99 |
| 65 | Chromafenozide            | $y=93934x+1903.8$  | 0.9999 | 0.48 | 1.59 | 11.43  |
| 66 | Tetrachlorantraniliprole  | $y=4213.7x-1449.5$ | 0.9992 | 0.29 | 0.95 | -13.88 |
| 67 | Spirotetramat             | $y=66194x-54820$   | 0.9999 | 0.17 | 0.57 | -29.08 |
| 68 | Epoxiconazole             | $y=79125x+43634$   | 0.9994 | 0.19 | 0.64 | -12.42 |
| 69 | Furan Tebufenozide        | $y=22802x+10332$   | 0.9994 | 0.21 | 0.71 | 4.36   |
| 70 | Diclocymet                | $y=8666.8x+4298.4$ | 0.9995 | 0.07 | 0.25 | -13.42 |
| 71 | Alachlor                  | $y=43013x+22425$   | 0.9993 | 0.27 | 0.89 | 17.17  |
| 72 | Tetraconazole             | $y=39710x+4677.2$  | 0.9994 | 0.07 | 0.24 | -0.15  |



|    |                 |                    |        |      |       |        |
|----|-----------------|--------------------|--------|------|-------|--------|
| 73 | Cyazofamid      | $y=60255x+62571$   | 0.9997 | 0.05 | 0.16  | 0.53   |
| 74 | Fenoxanil       | $y=90810x-753.98$  | 0.9991 | 0.10 | 0.33  | 15.66  |
| 75 | Picoxystrobin   | $y=180391x-150736$ | 0.9996 | 0.05 | 0.16  | 33.77  |
| 76 | Flusilazole     | $y=40461x+35688$   | 0.9994 | 0.14 | 0.47  | 11.99  |
| 77 | Kresoxim-Methyl | $y=30858x-2991.5$  | 0.9998 | 0.34 | 1.12  | -100   |
| 78 | Fipronil        | $y=35776x+35770$   | 0.9993 | 0.05 | 0.18  | -31.2  |
| 79 | Diazinon        | $y=159203x-180621$ | 0.9993 | 0.10 | 0.33  | 21.52  |
| 80 | Brassinolide    | $y=1187.9x+1377$   | 0.9993 | 3.84 | 12.80 | 15.98  |
| 81 | Tebuconazole    | $y=58562x+7110.4$  | 0.9998 | 0.21 | 0.70  | -2.72  |
| 82 | Pentrimazole    | $y=71050x+33395$   | 0.9997 | 0.15 | 0.19  | 18.66  |
| 83 | Pythiamin       | $y=215166x+26355$  | 0.9993 | 0.16 | 0.54  | 27.11  |
| 84 | Propiconazole   | $y=33052x+23629$   | 0.9993 | 0.25 | 0.82  | -5.92  |
| 85 | Pyraoxystrobin  | $y=566311x+673584$ | 0.9993 | 0.16 | 0.53  | 13.63  |
| 86 | Pyraclostrobin  | $y=51345x+84725$   | 0.9996 | 0.06 | 0.20  | 13.05  |
| 87 | Phoxim          | $y=17911x+14074$   | 0.9992 | 0.21 | 0.70  | 25.56  |
| 88 | Cyflufenamid    | $y=113712x-124712$ | 0.9995 | 0.24 | 0.79  | 20.33  |
| 89 | Diniconazole    | $y=29278x+1139.5$  | 0.9999 | 0.26 | 0.87  | -9.06  |
| 90 | Ametoctradin    | $y=187542x-70967$  | 0.9991 | 0.20 | 0.66  | 46.01  |
| 91 | Indoxacarb      | $y=9975x+14010$    | 0.9993 | 0.21 | 0.71  | -15.44 |
| 92 | Pretilachlor    | $y=424448x-365561$ | 0.9996 | 0.08 | 0.27  | 43.98  |
| 93 | Difenoconazole  | $y=93030x-28532$   | 0.9998 | 0.28 | 0.94  | -5.93  |
| 94 | Trifloxystrobin | $y=241872x-199253$ | 0.9996 | 0.13 | 0.45  | 33.85  |
| 95 | Profenofos      | $y=55466x-13390$   | 0.9999 | 0.06 | 0.21  | 12.32  |
| 96 | Enestroburin    | $y=92901x-52970$   | 0.9997 | 0.23 | 0.76  | 5.70   |
| 97 | Coumoxystrobin  | $y=59606x+3415$    | 0.9992 | 0.62 | 2.07  | 2.33   |
| 98 | Buprofezin      | $y=141664x-104352$ | 0.9996 | 0.18 | 0.60  | 19.69  |

|     |                    |                    |        |      |      |        |
|-----|--------------------|--------------------|--------|------|------|--------|
| 99  | Emamectin Benzoate | $y=107366x-57134$  | 0.9998 | 0.02 | 0.07 | -10.25 |
| 100 | Fenpropathrin      | $y=9061.2x-6411.7$ | 0.999  | 0.70 | 2.33 | 45.38  |
| 101 | Chlorpyrifos       | $y=39001x+3275.5$  | 0.9991 | 0.07 | 0.24 | 6.05   |
| 102 | Hexythiazox        | $y=62569x-74023$   | 0.9994 | 0.04 | 0.13 | 2.69   |
| 103 | Propargite         | $y=106538x-76302$  | 0.9998 | 0.06 | 0.21 | 2.77   |
| 104 | Spirodiclofen      | $y=21120x+8852.3$  | 0.9994 | 0.16 | 0.54 | 0.10   |
| 105 | Pyridaben          | $y=193825x-171370$ | 0.9996 | 0.27 | 0.89 | 17.41  |
| 106 | Carbosulfan        | $y=97355x-6575.5$  | 0.9997 | 0.05 | 0.18 | 2.59   |
| 107 | Etofenprox         | $y=68716x+84214$   | 0.9997 | 0.16 | 0.52 | 13.56  |
| 108 | Bifenthrin         | $y=13120x+11077$   | 0.9998 | 0.12 | 0.39 | -2.79  |

**Table S4.** Calibration curves, R<sup>2</sup>, LOD, LOQ, and matrix effects for each target pesticide in *Chrysanthemum Morifolium* Ramat.

| No. | Pesticide                 | Calibration curves | R <sup>2</sup> | LOD<br>(µg/kg) | LOQ<br>(µg/kg) | ME<br>(%) |
|-----|---------------------------|--------------------|----------------|----------------|----------------|-----------|
| 1   | Betaine                   | y=726.23x+60235    | 0.9998         | 0.36           | 1.19           | -94.93    |
| 2   | Acephate                  | y=36270x+22887     | 0.9997         | 0.91           | 3.05           | -71.70    |
| 3   | Omethoate                 | y=13561x+1029.9    | 0.9996         | 0.95           | 3.16           | -71.48    |
| 4   | 3-Indoleacetic acid       | y=5717.7x+2960.2   | 0.9996         | 0.65           | 2.16           | -16.22    |
| 5   | Aldicarb sulfoxide        | y=4032.7x-1972.7   | 0.9995         | 0.43           | 1.42           | -67.31    |
| 6   | Dinotefuran               | y=9475.3x-1336.8   | 0.9992         | 2.08           | 6.93           | -34.83    |
| 7   | Propamocarb               | y=13589x-5615.1    | 0.9998         | 0.70           | 2.32           | -25.54    |
| 8   | Aldicarb sulfone          | y=25941x+13075     | 0.9993         | 1.18           | 3.94           | -32.71    |
| 9   | Methomyl                  | y=8667.9x-11044    | 0.9993         | 0.13           | 0.43           | -37.69    |
| 10  | Deisopropylatrazine       | y=1871.7x+471.17   | 0.9994         | 1.09           | 3.64           | -69.99    |
| 11  | Thiamethoxam              | y=21368x-14945     | 0.9998         | 0.23           | 0.78           | -42.71    |
| 12  | Gibberellic acid          | y=707.07x+1474.3   | 0.9997         | 3.75           | 12.48          | -13.93    |
| 13  | Absciscic Acid            | y=9264.2x-7529.1   | 0.9998         | 0.43           | 1.44           | 40.12     |
| 14  | Pyrazosulfuron-Ethyl      | y=23433x-25500     | 0.9993         | 0.19           | 0.62           | 30.28     |
| 15  | Cycloxaprid               | y=7388.1x-3174.5   | 0.9994         | 0.72           | 2.41           | -68.74    |
| 16  | Clothianidin              | y=5314.7x-2705.9   | 0.9994         | 0.25           | 0.82           | -51.04    |
| 17  | Imidacloprid              | y=7448.3x-8157.8   | 0.9991         | 0.92           | 3.08           | -62.80    |
| 18  | Trichlorfon               | y=4221.2x+8648.3   | 0.9985         | 0.42           | 1.39           | -61.25    |
| 19  | 3-Hydroxycarbofuran       | y=3232.4x-2322.9   | 0.9991         | 1.07           | 3.56           | -62.38    |
| 20  | 6-Kinetin                 | y=10435x+30209     | 0.9992         | 1.08           | 3.59           | -87.67    |
| 21  | Sodium 5-Nitroguaiacolate | y=1545.3x+1351.8   | 0.9997         | 2.09           | 6.98           | -4.85     |
| 22  | Sodium 2-Nitrophenolate   | y=44445.x+322367   | 0.9985         | 0.25           | 0.84           | -45.16    |

|    |                         |                    |        |      |      |        |
|----|-------------------------|--------------------|--------|------|------|--------|
| 23 | Sodium 4-Nitrophenolate | $y=3990.4x+19687$  | 0.9997 | 0.25 | 0.82 | -47.12 |
| 24 | 2,4-D                   | $y=2842x+243.81$   | 0.9997 | 0.56 | 1.87 | 179.01 |
| 25 | Dimethoate              | $y=13672x-9121.4$  | 0.9994 | 0.18 | 0.60 | -69.71 |
| 26 | Acetamiprid             | $y=17310x-13376$   | 0.9992 | 0.18 | 0.59 | -65.19 |
| 27 | Carbendazim             | $y=27370x-6627.7$  | 0.9991 | 0.16 | 0.53 | -78.45 |
| 28 | Thiacloprid             | $y=24626x-22169$   | 0.9993 | 0.47 | 1.55 | -70.87 |
| 29 | Trinexapac-Ethyl        | $y=5544.6x-1811.7$ | 0.9994 | 1.33 | 4.43 | -52.58 |
| 30 | Tricyclazole            | $y=11800x-14282$   | 0.9992 | 0.22 | 0.74 | -75.79 |
| 31 | Indolbutyric Acid       | $y=2722.9x+59756$  | 0.9988 | 1.13 | 3.75 | -54.64 |
| 32 | 6-Benzylaminopurine     | $y=39910x-7489.7$  | 0.9993 | 0.70 | 2.32 | -65.31 |
| 33 | Thidiazuron             | $y=7508.7x-5155.1$ | 0.9994 | 0.16 | 0.55 | -53.53 |
| 34 | Dichlorvos              | $y=11239x+187577$  | 0.9809 | 0.96 | 3.22 | -67.63 |
| 35 | Carbofuran              | $y=2235x-26782$    | 0.999  | 0.27 | 0.91 | -87.31 |
| 36 | Carbaryl                | $y=5090.4x+43300$  | 0.9984 | 0.96 | 3.22 | -81.81 |
| 37 | Pirimicarb              | $y=32304x-36643$   | 0.9992 | 0.11 | 0.36 | -75.26 |
| 38 | Forchlorfenuron         | $y=13786x-3115.8$  | 0.9998 | 0.47 | 1.56 | -54.85 |
| 39 | RH-5849                 | $y=1368.9x-1990.2$ | 0.9998 | 0.97 | 3.22 | -92.33 |
| 40 | Isopropyl               | $y=19338x-9372.1$  | 0.9998 | 0.58 | 1.92 | -76.81 |
| 41 | Atrazine                | $y=10208x+7702.3$  | 0.9994 | 0.67 | 2.25 | -77.58 |
| 42 | Imidan                  | $y=37782x-26579$   | 0.9997 | 0.18 | 0.61 | -63.00 |
| 43 | Chlorantraniliprole     | $y=7751.7x+9274.5$ | 0.9993 | 0.27 | 0.89 | -58.59 |
| 44 | Clomazone               | $y=45107x-34626$   | 0.9999 | 1.17 | 3.91 | -74.10 |
| 45 | Azoxystrobin            | $y=143993x-321227$ | 0.9987 | 0.08 | 0.25 | -54.25 |
| 46 | Methyl Jasmonate        | $y=4818x+58990$    | 0.9997 | 0.58 | 1.93 | -61.17 |
| 47 | Pyrimethanil            | $y=7002.5x-2083.7$ | 0.9991 | 0.53 | 1.75 | -70.24 |
| 48 | Fenamidone              | $y=33900x-41349$   | 0.9992 | 0.95 | 3.17 | -35.65 |

|    |                           |                    |        |      |      |         |
|----|---------------------------|--------------------|--------|------|------|---------|
| 49 | Boscalid                  | $y=18252x-11997$   | 0.9992 | 0.47 | 1.57 | -48.14  |
| 50 | Dimethomorph              | $y=30490x-16695$   | 0.9996 | 0.57 | 1.89 | -41.05  |
| 51 | Mandipropamid             | $y=75507x-69922$   | 0.9998 | 0.16 | 0.53 | -47.71  |
| 52 | Isoprothiolane            | $y=60724x+99631$   | 0.9998 | 0.25 | 0.85 | -69.05  |
| 53 | Fluopicolide              | $y=20300x-10945$   | 0.9996 | 0.29 | 0.97 | -63.18  |
| 54 | Paclobutrazol             | $y=155133x+4100.8$ | 0.9994 | 1.03 | 3.43 | -51.64  |
| 55 | Uniconazole               | $y=12071x+3608.2$  | 0.9999 | 0.75 | 2.49 | -46.54  |
| 56 | Malathion                 | $y=23456x+52122$   | 0.9998 | 0.91 | 3.05 | -67.74  |
| 57 | Orysastrobin              | $y=102107x-99470$  | 0.9992 | 0.37 | 1.23 | -49.17  |
| 58 | Benthiavalicarb-Isopropyl | $y=30566x-26390$   | 0.9995 | 0.35 | 1.18 | -55.65  |
| 59 | Methoxyfenozide           | $y=11828x-8080$    | 0.9998 | 0.83 | 2.78 | -62.79  |
| 60 | Triadimefon               | $y=14955x-5891.4$  | 0.9998 | 0.78 | 2.61 | -53.40  |
| 61 | Tiadinil                  | $y=10299x-4292.9$  | 0.9995 | 0.12 | 0.40 | -3.13   |
| 62 | Cyproconazole             | $y=8602.3x+438.1$  | 0.9998 | 0.88 | 2.93 | -46.30  |
| 63 | Triazophos                | $y=151884x-121530$ | 0.9998 | 0.26 | 0.87 | -56.68  |
| 64 | Fenhexamid                | $y=12296x-1990.8$  | 0.9997 | 0.38 | 1.28 | -43.39  |
| 65 | Chromafenozide            | $y=39951x-14378$   | 0.9999 | 0.52 | 1.75 | -50.84  |
| 66 | Tetrachlorantraniliprole  | $y=2068x+132.66$   | 0.9999 | 0.55 | 1.85 | -45.06  |
| 67 | Spirotetramat             | $y=67668x+43968$   | 0.9997 | 0.18 | 0.59 | -100.00 |
| 68 | Epoxiconazole             | $y=3403x+349538$   | 0.9999 | 0.48 | 1.61 | -48.35  |
| 69 | Furan Tebufenozide        | $y=11266x-5811.3$  | 0.9996 | 0.83 | 2.77 | -50.92  |
| 70 | Diclocymet                | $y=8513.5x-4216.1$ | 0.9997 | 0.11 | 0.36 | 3.95    |
| 71 | Alachlor                  | $y=13771x+27196$   | 0.9999 | 0.96 | 3.19 | -66.31  |
| 72 | Tetraconazole             | $y=13260x+5025.5$  | 0.9995 | 0.72 | 2.40 | -59.22  |
| 73 | Cyazofamid                | $y=19722x-8365.2$  | 0.9999 | 0.26 | 0.88 | -67.73  |
| 74 | Fenoxanil                 | $y=32903x-26110$   | 0.9998 | 0.22 | 0.75 | -55.86  |

|     |                    |                    |        |      |       |        |
|-----|--------------------|--------------------|--------|------|-------|--------|
| 75  | Picoxystrobin      | $y=64210x-38207$   | 0.9999 | 0.24 | 0.78  | -60.41 |
| 76  | Flusilazole        | $y=13871x+840296$  | 0.9996 | 0.24 | 0.81  | -58.79 |
| 77  | Kresoxim-Methyl    | $y=7681.4x+6.4705$ | 0.9997 | 0.40 | 1.33  | -71.75 |
| 78  | Fipronil           | $y=40572x-17310$   | 0.9998 | 0.14 | 0.47  | 3.96   |
| 79  | Oxyfluorfen        | $y=40854x+136.24$  | 0.9993 | 0.63 | 2.09  | -70.04 |
| 80  | Diazinon           | $y=1676.1x+1386.8$ | 0.9998 | 0.64 | 2.13  | 46.49  |
| 81  | Brassinolide       | $y=25252x+11157$   | 0.9995 | 3.70 | 12.34 | -47.26 |
| 82  | Tebuconazole       | $y=23275x-10134$   | 0.9999 | 0.99 | 3.29  | -59.46 |
| 83  | Pentrimazole       | $y=71803x-80580$   | 0.9997 | 0.11 | 0.37  | -62.26 |
| 84  | Pythiamin          | $y=15186x+11952$   | 0.9998 | 0.77 | 2.57  | -45.78 |
| 85  | Propiconazole      | $y=263936x-239088$ | 0.9994 | 0.23 | 0.78  | -57.90 |
| 86  | Pyraoxystrobin     | $y=29130x+49144$   | 0.9998 | 0.10 | 0.35  | -51.06 |
| 87  | Pyraclostrobin     | $y=19886x+15418$   | 0.9999 | 0.94 | 3.14  | -68.11 |
| 88  | Phoxim             | $y=27085x-21454$   | 0.9992 | 0.25 | 0.85  | -67.32 |
| 89  | Cyflufenamid       | $y=12004x-532.9$   | 0.9992 | 0.84 | 2.81  | -53.60 |
| 90  | Diniconazole       | $y=77551x-59122$   | 0.9995 | 0.10 | 0.32  | -53.29 |
| 91  | Ametoctradin       | $y=6377.5x-2735.6$ | 0.9995 | 0.39 | 1.31  | -30.55 |
| 92  | Indoxacarb         | $y=132496x+88180$  | 0.9992 | 0.46 | 1.54  | -63.79 |
| 93  | Pretilachlor       | $y=42841x+11449$   | 0.9992 | 0.21 | 0.69  | -46.45 |
| 94  | Difenoconazole     | $y=72245x-60902$   | 0.9993 | 0.11 | 0.35  | -65.69 |
| 95  | Trifloxystrobin    | $y=22319x-26283$   | 0.9992 | 0.62 | 2.08  | -50.72 |
| 96  | Profenofos         | $y=42641x-2744.3$  | 0.9993 | 0.37 | 1.24  | -50.48 |
| 97  | Enestroburin       | $y=37995x-14482$   | 0.9996 | 0.97 | 3.24  | 60.24  |
| 98  | Coumoxystrobin     | $y=54778x-32580$   | 0.9994 | 0.14 | 0.45  | -54.33 |
| 99  | Buprofezin         | $y=94661x-13474$   | 0.9996 | 0.01 | 0.04  | -25.96 |
| 100 | Emamectin Benzoate | $y=3088.6x+8764.5$ | 0.9997 | 0.88 | 2.92  | -49.27 |

|     |               |                    |        |      |      |        |
|-----|---------------|--------------------|--------|------|------|--------|
| 101 | Fenpropathrin | $y=14372x+26635$   | 0.9993 | 0.33 | 1.11 | -57.02 |
| 102 | Chlorpyrifos  | $y=21852x+4394.7$  | 0.9998 | 0.08 | 0.27 | -58.02 |
| 103 | Hexythiazox   | $y=35783x-8279.7$  | 0.9993 | 0.18 | 0.59 | -59.95 |
| 104 | Propargite    | $y=9681.7x+7988.3$ | 0.9999 | 0.46 | 1.54 | -55.92 |
| 105 | Spirodiclofen | $y=80896x-62508$   | 0.9997 | 0.21 | 0.71 | -55.99 |
| 106 | Pyridaben     | $y=35511x+45199$   | 0.9998 | 0.56 | 1.85 | -64.09 |
| 107 | Carbosulfan   | $y=36803x-12237$   | 0.9997 | 0.19 | 0.64 | -55.28 |
| 108 | Etofenprox    | $y=4386.2x+5940.8$ | 0.9993 | 0.08 | 0.27 | -52.99 |

**Table S5.** Calibration curves, R<sup>2</sup>, LOD, LOQ, and matrix effects for each target pesticide in *Dendrobium officinale* Kimura et Migo.

| No. | Pesticide                 | Calibration curves | R <sup>2</sup> | LOD<br>(µg/kg) | LOQ<br>(µg/kg) | ME<br>(%) |
|-----|---------------------------|--------------------|----------------|----------------|----------------|-----------|
| 1   | Betaine                   | y=2008.7x+4824.5   | 0.9987         | 0.09           | 0.31           | -87.74    |
| 2   | Acephate                  | y=7234.7x+22622    | 0.9986         | 0.52           | 1.75           | -71.59    |
| 3   | Omethoate                 | y=13695x+22012     | 0.9992         | 0.10           | 0.34           | -66.89    |
| 4   | 3-Indoleacetic acid       | y=8787.7x+94389    | 0.9994         | 0.10           | 0.34           | -6.5      |
| 5   | Aldicarb sulfoxide        | y=4532.6x-5465.8   | 0.9990         | 0.43           | 1.43           | -63.84    |
| 6   | Dinotefuran               | y=14769x+27405     | 0.9995         | 0.45           | 1.51           | -16.07    |
| 7   | Propamocarb               | y=9391.3x+126922   | 0.9987         | 0.09           | 0.30           | -51.04    |
| 8   | Aldicarb sulfone          | y=43431x+65890     | 0.9995         | 0.34           | 1.24           | -2.09     |
| 9   | Methomyl                  | y=14387x+7626.6    | 0.9997         | 0.17           | 0.55           | -12.75    |
| 10  | Deisopropylatrazine       | y=4305.6x+4573.8   | 0.999          | 0.45           | 1.50           | -42.87    |
| 11  | Thiamethoxam              | y=44661x+4691.7    | 0.9994         | 0.06           | 0.19           | -2.46     |
| 12  | Gibberellic acid          | y=993.55x+1181.1   | 0.9991         | 1.94           | 6.46           | 30.40     |
| 13  | Absciscic Acid            | y=2485.2x+33857    | 0.9995         | 0.13           | 0.43           | 27.21     |
| 14  | Pyrazosulfuron-Ethyl      | y=35151x+22518     | 0.9997         | 0.16           | 0.545          | 49.19     |
| 15  | Cycloxaprid               | y=26611x+21221     | 0.9995         | 0.40           | 1.34           | -13.49    |
| 16  | Clothianidin              | y=10259x+10700     | 0.9995         | 0.27           | 0.89           | -19.59    |
| 17  | Imidacloprid              | y=19032x+496283    | 0.9996         | 0.20           | 0.66           | -100      |
| 18  | Trichlorfon               | y=12598x+23142     | 0.9996         | 0.36           | 1.21           | -11.96    |
| 19  | 3-Hydroxycarbofuran       | y=7297.7x+8089.9   | 0.9991         | 0.26           | 0.86           | -40.94    |
| 20  | 6-Kinetin                 | y=27231x+26972     | 0.9998         | 1.16           | 3.87           | -70.61    |
| 21  | Sodium 5-Nitroguaiacolate | y=1358.1x+5206.7   | 0.9991         | 3.87           | 12.90          | 1.34      |
| 22  | Sodium 2-Nitrophenolate   | y=6716.4x+54049    | 0.999          | 0.14           | 0.46           | -13.14    |



|    |                         |                    |        |      |      |        |
|----|-------------------------|--------------------|--------|------|------|--------|
| 23 | Sodium 4-Nitrophenolate | $y=6324.7x+50268$  | 0.9997 | 0.28 | 0.95 | -17.15 |
| 24 | 2,4-D                   | $y=2693.3x+297.97$ | 0.9994 | 0.49 | 1.64 | 5.15   |
| 25 | Dimethoate              | $y=32484x-775.7$   | 0.9994 | 0.04 | 0.12 | -43.32 |
| 26 | Acetamiprid             | $y=39630x-573.08$  | 0.9992 | 0.07 | 0.25 | -42.94 |
| 27 | Carbendazim             | $y=56976x+47771$   | 0.9999 | 0.18 | 0.59 | -100   |
| 28 | Thiacloprid             | $y=49912x+23108$   | 0.9999 | 0.26 | 0.87 | -53.63 |
| 29 | Trinexapac-Ethyl        | $y=13289x+1464.8$  | 0.9999 | 0.95 | 3.17 | -16.15 |
| 30 | Tricyclazole            | $y=24513x+2994.6$  | 0.9999 | 0.38 | 1.27 | -53.92 |
| 31 | Indolbutyric Acid       | $y=4875.6x+5036.5$ | 0.9996 | 1.03 | 3.44 | -19.40 |
| 32 | 6-Benzylaminopurine     | $y=56841x+19541$   | 0.9999 | 1.01 | 3.37 | -49.22 |
| 33 | Thidiazuron             | $y=14120x+11698$   | 0.9997 | 0.22 | 0.74 | -13.08 |
| 34 | Dichlorvos              | $y=22705x+21038$   | 0.9998 | 0.98 | 3.26 | -34.84 |
| 35 | Carbofuran              | $y=95026x+32237$   | 0.9998 | 0.11 | 0.37 | -33.92 |
| 36 | Carbaryl                | $y=20614x+12655$   | 0.9998 | 0.48 | 1.59 | -38.62 |
| 37 | Pirimicarb              | $y=116308x+69339$  | 0.9996 | 0.12 | 0.39 | -24.39 |
| 38 | Forchlorfenuron         | $y=28551x+24131$   | 0.9995 | 0.31 | 1.02 | -15.87 |
| 39 | RH-5849                 | $y=20877x+10985$   | 0.9997 | 0.27 | 0.89 | 16.11  |
| 40 | Isopropyl               | $y=71656x+68057$   | 0.9995 | 0.22 | 0.75 | -29.09 |
| 41 | Atrazine                | $y=28916x+34972$   | 0.9995 | 0.26 | 0.86 | -33.66 |
| 42 | Imidan                  | $y=109490x+17767$  | 0.9998 | 0.04 | 0.13 | -15.19 |
| 43 | Chlorantraniliprole     | $y=21856x+17700$   | 0.9996 | 0.11 | 0.36 | -2.24  |
| 44 | Clomazone               | $y=113319x-11497$  | 1      | 0.19 | 0.64 | -45.31 |
| 45 | Azoxystrobin            | $y=305991x-233460$ | 0.9999 | 0.18 | 0.61 | -8.2   |
| 46 | Methyl Jasmonate        | $y=11584x+26911$   | 0.9994 | 0.10 | 0.32 | -9.66  |
| 47 | Pyrimethanil            | $y=21915x+13077$   | 0.9998 | 0.09 | 0.31 | -18.7  |
| 48 | Fenamidone              | $y=64819x+24224$   | 0.9996 | 0.12 | 0.39 | 4.73   |

|    |                           |                    |        |      |         |        |
|----|---------------------------|--------------------|--------|------|---------|--------|
| 49 | Boscalid                  | $y=39405x+14744$   | 0.9997 | 0.10 | 0.32    | 1.72   |
| 50 | Dimethomorph              | $y=60845x+103080$  | 0.9995 | 0.55 | 1.83    | 7.86   |
| 51 | Mandipropamid             | $y=149917x+851119$ | 0.9995 | 0.14 | 0.48    | -4.58  |
| 52 | Isoprothiolane            | $y=190028x+159898$ | 0.9997 | 0.12 | 0.41    | -13.93 |
| 53 | Fluopicolide              | $y=50415x+147655$  | 0.9986 | 0.09 | 0.30    | -12.01 |
| 54 | Paclobutrazol             | $y=36433x+76453$   | 0.9997 | 0.20 | 0.68    | -1.28  |
| 55 | Uniconazole               | $y=25250x+42624$   | 0.9996 | 0.16 | 0.54    | -9.01  |
| 56 | Malathion                 | $y=73056x+756749$  | 0.9996 | 0.21 | 0.39    | -8.24  |
| 57 | Orysastrobina             | $y=178194x+141730$ | 0.9995 | 0.42 | 1.41    | -11.03 |
| 58 | Benthiavalicarb-Isopropyl | $y=66069x+68028$   | 0.9998 | 0.10 | 0.34    | -5.11  |
| 59 | Methoxyfenozide           | $y=33275x+65546$   | 0.9994 | 0.21 | 0.69    | -11.21 |
| 60 | Triadimefon               | $y=40481x+18441$   | 0.9996 | 0.55 | 1.84    | 4.78   |
| 61 | Tiadinil                  | $y=11855x+24701$   | 0.9993 | 0.10 | 0.34    | 20.22  |
| 62 | Cyproconazole             | $y=20006x+21949$   | 0.9997 | 0.11 | 0.38    | -7.56  |
| 63 | Triazophos                | $y=369262x+18469$  | 0.9999 | 0.13 | 0.46    | 12.36  |
| 64 | Fenhexamid                | $y=22483x+14565$   | 0.9994 | 0.12 | 0.39    | 0.63   |
| 65 | Chromafenozide            | $y=7913x+1508.9$   | 0.9993 | 0.06 | 0.19    | -12.02 |
| 66 | Tetrachlorantraniliprole  | $y=4457.1x+3241$   | 0.9999 | 0.12 | 0.41    | -8.24  |
| 67 | Spirotetramat             | $y=70767x-12432$   | 0.9994 | 0.10 | 0.33    | 22.02  |
| 68 | Epoxiconazole             | $y=77647x+117208$  | 0.9994 | 0.54 | 1.80    | 0.47   |
| 69 | Furan Tebufenozide        | $y=17951x+11947$   | 0.9997 | 0.26 | 0.87    | -100   |
| 70 | Diclocymet                | $y=8859.4x+12537$  | 0.9997 | 0.12 | 0.39    | 14.27  |
| 71 | Alachlor                  | $y=35566x+21093$   | 0.9996 | 0.42 | 1.400.1 | -16.18 |
| 72 | Tetraconazole             | $y=34673x+18611$   | 0.9997 | 0.27 | 0.89    | -6.62  |
| 73 | Cyazofamid                | $y=55531x+40511$   | 0.9997 | 0.26 | 0.87    | -12.67 |
| 74 | Fenoxanil                 | $y=79786x+36360$   | 0.9997 | 0.11 | 0.36    | -12.59 |

|     |                    |                    |        |       |       |        |
|-----|--------------------|--------------------|--------|-------|-------|--------|
| 75  | Picoxystrobin      | $y=113573x+99771$  | 0.9995 | 0.04  | 0.13  | -17.97 |
| 76  | Flusilazole        | $y=39595x+18697$   | 0.9997 | 0.17  | 0.56  | -8.01  |
| 77  | Kresoxim-Methyl    | $y=23354x+250776$  | 0.9995 | 0.29  | 0.98  | -23.12 |
| 78  | Fipronil           | $y=49547x+69488$   | 0.9993 | 0.06  | 0.22  | 46.26  |
| 79  | Diazinon           | $y=112558x+74648$  | 0.9997 | 0.10  | 0.33  | -23.06 |
| 80  | Brassinolide       | $y=978.14x+4327.4$ | 0.999  | 3.21  | 10.70 | -6.94  |
| 81  | Tebuconazole       | $y=41062x+912705$  | 0.9992 | 0.04  | 0.14  | -0.92  |
| 82  | Pentrimazole       | $y=55749x+23564$   | 0.9995 | 0.18  | 0.60  | -14.01 |
| 83  | Pythiamin          | $y=185869x-2518.1$ | 0.9993 | 0.18  | 0.59  | -13.23 |
| 84  | Propiconazole      | $y=30680x+24329$   | 0.9998 | 0.12  | 0.42  | 4.46   |
| 85  | Pyraoxystrobin     | $y=561606x+749517$ | 0.9997 | 0.51  | 0.49  | -4.40  |
| 86  | Pyraclostrobin     | $y=50002x+969842$  | 0.998  | 0.05  | 0.16  | -18.42 |
| 87  | Phoxim             | $y=42844x+185293$  | 0.9974 | 0.16  | 0.53  | -11.88 |
| 88  | Cyflufenamid       | $y=64361x+48359$   | 0.9991 | 0.13  | 0.44  | -7.89  |
| 89  | Diniconazole       | $y=29690x+13026$   | 0.9997 | 0.22  | 0.73  | 2.29   |
| 90  | Ametoctradin       | $y=146300x+106163$ | 0.9995 | 0.19  | 0.63  | -18.13 |
| 91  | Indoxacarb         | $y=11818x+11625$   | 0.9999 | 0.17  | 0.58  | 13.96  |
| 92  | Pretilachlor       | $y=366634x+110050$ | 0.9998 | 0.80  | 2.66  | -10.18 |
| 93  | Difenoconazole     | $y=99221x+553000$  | 0.9993 | 0.04  | 0.15  | 11.50  |
| 94  | Trifloxystrobin    | $y=186495x+105698$ | 0.9996 | 0.13  | 0.44  | -13.98 |
| 95  | Profenofos         | $y=49890-6532.5$   | 0.9994 | 0.45  | 1.52  | -4.98  |
| 96  | Enestroburin       | $y=82926x+73350$   | 0.9993 | 0.08  | 0.25  | -5.47  |
| 97  | Coumoxystrobin     | $y=52020x+84700$   | 0.9995 | 0.39  | 1.32  | -8.34  |
| 98  | Buprofezin         | $y=112379x+150781$ | 0.9992 | 0.18  | 0.61  | -15.82 |
| 99  | Enamectin Benzoate | $y=98415x+86666$   | 0.9997 | 0.111 | 0.38  | 5.06   |
| 100 | Fenpropathrin      | $y=5041.5x+24912$  | 0.9996 | 0.58  | 1.94  | -30.97 |

|     |               |                    |        |      |      |        |
|-----|---------------|--------------------|--------|------|------|--------|
| 101 | Chlorpyrifos  | $y=32040x++158091$ | 0.9996 | 0.08 | 0.26 | -14.76 |
| 102 | Hexythiazox   | $y=57018x+17552$   | 0.9996 | 0.12 | 0.38 | -2.82  |
| 103 | Propargite    | $y=110744x-9268.2$ | 0.9997 | 0.08 | 0.28 | -2.36  |
| 104 | Spirodiclofen | $y=21537x+8722.6$  | 0.9999 | 0.27 | 0.90 | 0.32   |
| 105 | Pyridaben     | $y=170674x+54485$  | 0.9995 | 0.06 | 0.21 | -6.16  |
| 106 | Carbosulfan   | $y=98378x+86087$   | 0.9997 | 0.05 | 0.28 | -3.35  |
| 107 | Etofenprox    | $y=63424x+63045$   | 0.9993 | 0.10 | 0.32 | -10.81 |
| 108 | Bifenthrin    | $y=12713x+2481.7$  | 0.9998 | 0.48 | 1.59 | 26.80  |

**Table S6.** Average recoveries and RSD of 108 pesticides in *Fritillaria thunbergii* Miq, *Chrysanthemum Morifolium* Ramat, and *Dendrobium officinale* Kimura et Migo.

| No. | Pesticides           | <i>Fritillaria thunbergii</i> Miq |                  |                  |           |           | <i>Chrysanthemum Morifolium</i> Ramat |                  |                  |            |           | <i>Dendrobium officinale</i> Kimura et Migo |                  |                  |           |           |
|-----|----------------------|-----------------------------------|------------------|------------------|-----------|-----------|---------------------------------------|------------------|------------------|------------|-----------|---------------------------------------------|------------------|------------------|-----------|-----------|
|     |                      | Mean recovery (%)                 |                  |                  | Intra-day | Inter-day | Mean recovery (%)                     |                  |                  | Intra-day  | Inter-day | Mean recovery (%)                           |                  |                  | Intra-day | Inter-day |
|     |                      | 20                                | 50               | 100              |           |           | 20                                    | 50               | 100              |            |           | 20                                          | 50               | 100              |           |           |
|     |                      | $\mu\text{g/kg}$                  | $\mu\text{g/kg}$ | $\mu\text{g/kg}$ | RSD (%)   | RSD (%)   | $\mu\text{g/kg}$                      | $\mu\text{g/kg}$ | $\mu\text{g/kg}$ | RSD (%)    | RSD (%)   | $\mu\text{g/kg}$                            | $\mu\text{g/kg}$ | $\mu\text{g/kg}$ | RSD (%)   | RSD (%)   |
| 1   | Betaine              | 16.1                              | 23.9             | 17.52            | 5.07-6.39 | 5.43      | 61.59                                 | 62.62            | 69.93            | 3.65-12.83 | 4.05      | 82.36                                       | 85.26            | 73.99            | 0.63-2.63 | 2.53      |
| 2   | Acephate             | 86.08                             | 77.98            | 75.94            | 1.80-3.99 | 5.44      | 84.36                                 | 71.79            | 75.06            | 2.36-6.89  | 9.92      | 75.21                                       | 76.36            | 76.28            | 0.74-2.24 | 9.65      |
| 3   | Omethoate            | 76.69                             | 74.56            | 80.23            | 2.61-4.37 | 4.44      | 80.66                                 | 83.4             | 86.46            | 1.77-8.31  | 7.83      | 78.16                                       | 70.17            | 78.82            | 2.72-4.09 | 8.54      |
| 4   | 3-Indoleacetic Acid  | 92.49                             | 97.38            | 93.9             | 2.93-6.13 | 6.54      | 107.13                                | 97.78            | 104.68           | 1.57-1.91  | 6.67      | 106.8                                       | 97.06            | 93.85            | 2.06-3.30 | 3.14      |
| 5   | Aldicarb sulfoxide   | 76.08                             | 80.8             | 88.47            | 3.3-4.44  | 4.47      | 72.81                                 | 72.06            | 81.41            | 4.35-7.42  | 5.93      | 81.09                                       | 79.77            | 83.73            | 2.28-3.95 | 8.12      |
| 6   | Dinotefuran          | 80.42                             | 87.65            | 96.58            | 2.03-7.37 | 5.83      | 79.93                                 | 82.12            | 83.25            | 2.12-5.5   | 5.92      | 94.79                                       | 88.81            | 92.25            | 1.74-2.18 | 10.16     |
| 7   | Propamocarb          | 74.61                             | 72.43            | 74.62            | 2.91-5.45 | 8.61      | 69.45                                 | 61.21            | 68.59            | 2.57-3.19  | 4.35      | 77.92                                       | 72.26            | 79.56            | 2.25-3.58 | 2.72      |
| 8   | Aldicarb Sulfone     | 90.15                             | 109.95           | 94.59            | 2.23-4.77 | 4.14      | 96.25                                 | 91.54            | 101.24           | 1.77-2.04  | 2.87      | 89.89                                       | 89.26            | 92.65            | 0.75-3.38 | 4.28      |
| 9   | Methomyl             | 89.79                             | 99.19            | 92.14            | 1.98-4.32 | 4.38      | 95.25                                 | 92.69            | 96.18            | 1.85-4.45  | 3.71      | 94.79                                       | 88.81            | 92.25            | 1.74-2.18 | 3.62      |
| 10  | Deisopropylatrazine  | 87.74                             | 93.42            | 93.33            | 1.13-5.73 | 5.05      | 80.39                                 | 93.65            | 108.28           | 7.38-8.18  | 7.9       | 92                                          | 90.25            | 89.11            | 2.76-6.35 | 7.43      |
| 11  | Thiamethoxam         | 92.92                             | 94.57            | 93.37            | 1.45-2.49 | 3.14      | 94.67                                 | 90.45            | 99.17            | 1.73-5.45  | 6.31      | 97.55                                       | 88               | 88.65            | 0.8-2.59  | 2.38      |
| 12  | Gibberellic Acid     | 91.03                             | 73.7             | 79.05            | 4.15-6.65 | 4.4       | 83.58                                 | 77.2             | 82.52            | 2.16-6.93  | 10.01     | 83.64                                       | 87.85            | 83.87            | 3.08-3.68 | 10.74     |
| 13  | Absciscic Acid       | 94.2                              | 95.66            | 97.27            | 1.44-2.77 | 2.51      | 110.01                                | 111.12           | 110.1            | 1.11-5.6   | 12.36     | 111.52                                      | 107.9            | 96.53            | 2.01-7.83 | 9.5       |
| 14  | Pyrazosulfuron-Ethyl | 81.73                             | 99.98            | 92.25            | 2.77-5.08 | 8.39      | 104.72                                | 95.69            | 93.34            | 1.74-3.27  | 2.98      | 104.85                                      | 94.03            | 92.8             | 2.26-3.22 | 2.97      |
| 15  | Cycloxaprid          | 94.54                             | 95.74            | 88.18            | 1.70-6.65 | 5.06      | 70.54                                 | 72.49            | 78.29            | 6.27-8.33  | 6.08      | 73.26                                       | 74.98            | 78.52            | 1.59-2.27 | 3.22      |
| 16  | Clothianidin         | 92.06                             | 93.59            | 91.52            | 3.88-6.19 | 4.3       | 87.24                                 | 91.62            | 95.94            | 2.86-4.69  | 6.6       | 97.8                                        | 87.15            | 90.22            | 3.73-4.21 | 3.74      |
| 17  | Imidacloprid         | 94.86                             | 97.45            | 94.5             | 3.40-4.08 | 7.85      | 85.43                                 | 93.31            | 94.93            | 2.26-6.74  | 5.72      | 104.43                                      | 105              | 101.94           | 1.31-2.65 | 1.19      |
| 18  | Trichlorfon          | 87.13                             | 89.24            | 91.76            | 2.33-3.62 | 2.82      | 90.7                                  | 89.17            | 103.99           | 3.25-14.21 | 5.56      | 96.25                                       | 98.31            | 95.5             | 1.15-3.37 | 11.91     |

|    |                           |        |        |        |            |       |        |        |        |            |       |        |       |        |            |      |
|----|---------------------------|--------|--------|--------|------------|-------|--------|--------|--------|------------|-------|--------|-------|--------|------------|------|
| 19 | 3-Hydroxycarbofuran       | 97.35  | 93.96  | 92.14  | 4.96-5.72  | 5.67  | 86.65  | 86.42  | 87.72  | 2.75-7.06  | 9.07  | 96.33  | 98.36 | 97.23  | 1.99-5.26  | 4.15 |
| 20 | 6-Kinetin                 | 44.3   | 45.07  | 35.35  | 3.53-16.02 | 11.57 | 61.53  | 63.93  | 61.47  | 1.44-11.74 | 6.68  | 49.16  | 34.66 | 35.51  | 0.13-6.96  | 5.58 |
| 21 | Sodium 5-Nitroguaiacolate | 103.8  | 95.86  | 98.68  | 5.43-12.16 | 3.76  | 108.14 | 103.03 | 104.16 | 2.07-6.84  | 11.01 | 92.57  | 80.52 | 96.3   | 2.63-8.13  | 4.6  |
| 22 | Sodium 2-Nitrophenolate   | 90.58  | 95.92  | 93.31  | 1.70-4.81  | 6.38  | 108.66 | 100.3  | 106.49 | 1.61-2.35  | 1.87  | 92.42  | 96.97 | 94.53  | 3.58-6.93  | 6.64 |
| 23 | Sodium 4-Nitrophenolate   | 91.88  | 88.04  | 93.62  | 1.56-3.80  | 5.14  | 107.39 | 104.29 | 106.67 | 2.69-2.94  | 1.94  | 99.63  | 94.23 | 95.71  | 1.65-7.11  | 6.78 |
| 24 | 2,4-D                     | 80.37  | 78.3   | 79.86  | 5.21-9.00  | 4.61  | 95.28  | 91.73  | 94.86  | 2.29-5.03  | 6.77  | 82.4   | 77.71 | 77.44  | 4.87-12.58 | 9.85 |
| 25 | Dimethoate                | 103.49 | 101.07 | 92.7   | 2.97-4.40  | 4.53  | 98.92  | 93.09  | 97.76  | 0.46-8.61  | 5.43  | 109.12 | 96.27 | 97.04  | 1.52-3.81  | 4.85 |
| 26 | Acetamiprid               | 97.53  | 95.85  | 94.3   | 0.81-5.40  | 4.95  | 102.86 | 87.62  | 94.5   | 3.38-5.7   | 3.02  | 106.92 | 97.67 | 97.79  | 1.83-3.63  | 3.5  |
| 27 | Carbendazim               | 75.25  | 78.86  | 72.94  | 2.34-4.22  | 2.76  | 78.52  | 77.45  | 81.83  | 1.65-4.73  | 6.89  | 79.42  | 78.83 | 74.11  | 3.85-4.83  | 6.21 |
| 28 | Thiacloprid               | 92.76  | 98.71  | 96.75  | 1.11-4.16  | 4.22  | 106.43 | 94.41  | 101.13 | 1.64-7.77  | 3.06  | 101.63 | 90.79 | 92.63  | 1.16-4.34  | 5.38 |
| 29 | Trinexapac-Ethyl          | 95.84  | 101.16 | 95.5   | 4.66-16.82 | 11.61 | 94.55  | 95.68  | 96.09  | 1.87-2.89  | 5.21  | 93.55  | 94.98 | 94.84  | 2.51-8.98  | 8.71 |
| 30 | Tricyclazole              | 78.12  | 83.84  | 75.71  | 3.74-11.11 | 2.03  | 88.75  | 75.32  | 87.02  | 1.9-7.74   | 5.53  | 75.58  | 70.88 | 76.45  | 2.12-3.88  | 4.26 |
| 31 | Indolbutyric Acid         | 79.86  | 90.36  | 93.71  | 4.73-8.73  | 6.69  | 88.03  | 90.27  | 95.32  | 3.03-5.61  | 6.78  | 87.93  | 86.98 | 84.24  | 6.37-9.90  | 7.76 |
| 32 | 6-Benzylaminopurine       | 17.82  | 26.55  | 27.55  | 6.48-8.92  | 6.48  | 68.97  | 63.11  | 69.48  | 1.76-7.79  | 11.79 | 55.13  | 45.54 | 48.73  | 2.44-5.38  | 5.55 |
| 33 | Thidiazuron               | 52.47  | 46.87  | 41     | 1.60-8.62  | 8.62  | 109.7  | 87.15  | 93.93  | 1.96-11.35 | 5.36  | 66.92  | 63.95 | 63.37  | 3.35-3.95  | 5.69 |
| 34 | Dichlorvos                | 105.71 | 97.16  | 96.38  | 1.38-7.02  | 1.21  | 110.3  | 96.27  | 100.19 | 1.56-3.16  | 1.73  | 105.81 | 93.85 | 94.46  | 2.45-6.65  | 6.87 |
| 35 | Carbofuran                | 89.04  | 101.18 | 107.93 | 2.30-7.76  | 5.14  | 109.34 | 100.3  | 103.91 | 1.33-3.8   | 3.74  | 107.12 | 97.99 | 100.09 | 2.13-2.28  | 1.87 |
| 36 | Carbaryl                  | 93.29  | 89.27  | 87.96  | 4.46-10.05 | 8.73  | 109.19 | 86.36  | 90.23  | 6.37-10.92 | 6.99  | 98.13  | 89.78 | 93.1   | 2.25-6.31  | 6.13 |
| 37 | Pirimicarb                | 92.93  | 103.46 | 96.71  | 1.75-4.73  | 3.63  | 108.12 | 92.95  | 102.29 | 1.47-3.17  | 1.53  | 98     | 90.82 | 92.43  | 2.06-2.54  | 2.33 |
| 38 | Forchlorfenuron           | 53.71  | 52.82  | 47.43  | 2.69-4.84  | 6.39  | 100.37 | 91.54  | 100.21 | 4.63-11.57 | 5.92  | 78.26  | 74.01 | 72.68  | 2.55-3.53  | 3.9  |
| 39 | RH-5849                   | 91.99  | 106.8  | 96.79  | 1.80-4.38  | 4.34  | 78.94  | 80.75  | 96.05  | 3.75-5.79  | 5.53  | 98.3   | 93.54 | 93.02  | 2.95-5.15  | 4.18 |
| 40 | Isopropyl                 | 91.87  | 108.06 | 95.42  | 2.23-4.84  | 5.38  | 105.46 | 94.38  | 98.53  | 1.23-7.31  | 2.19  | 101.48 | 92.79 | 93.48  | 2.13-3.01  | 2.66 |
| 41 | Atrazine                  | 98.22  | 108.7  | 93.9   | 1.69-4.65  | 2.22  | 97.89  | 97.55  | 103.75 | 2.64-4.18  | 9.76  | 99.67  | 92.06 | 92.65  | 2.39-2.96  | 4.04 |

|    |                               |        |        |        |            |      |        |        |        |            |      |        |        |        |           |       |
|----|-------------------------------|--------|--------|--------|------------|------|--------|--------|--------|------------|------|--------|--------|--------|-----------|-------|
| 42 | Imidan                        | 97.3   | 96.86  | 97.62  | 2.52-18.37 | 2.15 | 94.77  | 94.43  | 97.59  | 1.39-2.87  | 2.7  | 114.41 | 93.32  | 94.04  | 2.87-3.68 | 2.35  |
| 43 | Chlorantraniliprole           | 109.49 | 104.61 | 97.62  | 3.25-8.00  | 2.89 | 79.13  | 92.36  | 97.45  | 2.4-3.08   | 6.21 | 103.56 | 91.86  | 93.46  | 1.26-2.88 | 3.56  |
| 44 | Clomazone                     | 87.71  | 101.78 | 101.12 | 2.62-4.15  | 6.25 | 96.09  | 96.24  | 99.42  | 0.7-1.68   | 1.92 | 102.24 | 91.86  | 94.14  | 1.52-2.37 | 2.29  |
| 45 | Azoxystrobin                  | 90.22  | 99.23  | 89.01  | 2.43-5.05  | 4.19 | 104.95 | 95.91  | 105.19 | 1.79-3.58  | 3.6  | 103.9  | 101.78 | 97.55  | 1.38-2.22 | 1.78  |
| 46 | Methyl Jasmonate              | 91.78  | 98.06  | 92.58  | 1.92-6.24  | 4.75 | 108.52 | 98.08  | 97.9   | 1.78-4.49  | 3.35 | 97.61  | 94.62  | 94.14  | 4.10-6.57 | 5.48  |
| 47 | Pyrimethanil                  | 88.05  | 91.27  | 82.15  | 3.00-4.29  | 4.57 | 91.35  | 90.21  | 94.79  | 1.99-7.12  | 8.94 | 95.12  | 86.33  | 84.22  | 1.27-5.06 | 6.46  |
| 48 | Fenamidone                    | 93.69  | 89.46  | 89.85  | 1.46-2.33  | 4.07 | 94.31  | 95.75  | 96.77  | 0.76-3.78  | 6.08 | 96.36  | 93.12  | 94.39  | 1.88-3.87 | 4.49  |
| 49 | Boscalid                      | 96.97  | 97.31  | 92.36  | 0.83-2.90  | 2.64 | 100.31 | 96.46  | 99     | 0.8-5.66   | 5.1  | 107.68 | 92.99  | 94.17  | 1.45-9.42 | 7.36  |
| 50 | Dimethomorph                  | 97.29  | 99.39  | 94.19  | 0.27-2.48  | 2.12 | 97.58  | 92.09  | 97.79  | 2.75-4.42  | 4.95 | 109.04 | 104.24 | 100.76 | 1.55-3.20 | 1.59  |
| 51 | Mandipropamid                 | 95.9   | 97.12  | 97.25  | 1.27-3.88  | 3.02 | 97.95  | 95.66  | 95.9   | 1.02-3.5   | 1.64 | 104.51 | 93.63  | 96.52  | 1.46-3.43 | 1.75  |
| 52 | Isoprothiolane                | 94.22  | 95.79  | 95.74  | 1.67-4.49  | 4.31 | 105.42 | 105.29 | 108.49 | 0.84-1.71  | 1.68 | 101.06 | 95.32  | 94.72  | 3.18-3.55 | 3.67  |
| 53 | Fluopicolide                  | 95.03  | 99.26  | 94.87  | 1.69-2.50  | 5.06 | 86.91  | 90.06  | 99.17  | 2.63-14.1  | 1.63 | 96.63  | 94.3   | 96.15  | 1.03-3.57 | 5.5   |
| 54 | Paclobutrazol                 | 93.05  | 94.98  | 97.44  | 1.20-2.22  | 5.65 | 83.34  | 90.92  | 95.82  | 1.27-11.84 | 5.03 | 109.14 | 96.16  | 92.94  | 3.34-3.9  | 3.04  |
| 55 | Uniconazole                   | 94.97  | 97.81  | 95.41  | 1.20-5.45  | 6.08 | 90.9   | 90.67  | 95.76  | 3.63-13.9  | 3.28 | 104.28 | 95.27  | 96.17  | 3.55-5.38 | 5.43  |
| 56 | Malathion                     | 93.52  | 92.19  | 93.9   | 2.23-3.30  | 2.9  | 98.3   | 96.23  | 95.67  | 1.19-2.26  | 5.05 | 94.73  | 91.13  | 96.89  | 2.61-4.94 | 2.53  |
| 57 | Orysastrobin                  | 95.54  | 95.3   | 98.24  | 0.86-2.65  | 2.18 | 98.63  | 97.37  | 98.12  | 0.81-1.56  | 1.24 | 105.67 | 92.64  | 96.36  | 2.43-2.83 | 3.22  |
| 58 | Benthiavalicarb-<br>Isopropyl | 92.38  | 94.49  | 93.34  | 1.06-3.31  | 2.98 | 97.3   | 100.59 | 97.32  | 1.76-4.24  | 3.54 | 103.56 | 95.29  | 95.15  | 3.38-3.69 | 2.74  |
| 59 | Methoxyfenozide               | 89.69  | 99.5   | 93.46  | 1.91-3.82  | 4.77 | 92.66  | 98.54  | 105.25 | 5.09-9.85  | 8.33 | 102.36 | 96.73  | 93.57  | 2.25-4.91 | 6.39  |
| 60 | Triadimefon                   | 83.19  | 91.79  | 89.16  | 1.32-6.04  | 5.04 | 77.03  | 97.44  | 96.67  | 1.02-7.58  | 6.96 | 112.92 | 93.33  | 93.09  | 2.33-6.06 | 9.31  |
| 61 | Tiadinil                      | 95.39  | 98.64  | 90.57  | 2.74-3.75  | 4.26 | 96.6   | 88.3   | 99.01  | 3.24-6.93  | 0.97 | 96.73  | 92     | 92.79  | 3.04-5.58 | 5.18  |
| 62 | Cyproconazole                 | 107.69 | 98.02  | 91.11  | 2.03-6.39  | 7.39 | 98.71  | 83.79  | 92.08  | 2.92-4.45  | 5.58 | 93.82  | 95.19  | 95.9   | 3.21-4.34 | 3.26  |
| 63 | Triazophos                    | 98.38  | 94.07  | 93.09  | 0.67-3.15  | 3.55 | 95.12  | 95.56  | 97.48  | 1.45-2.3   | 2.22 | 104.66 | 91.41  | 95.11  | 2.07-4.53 | 2.79  |
| 64 | Fenhexamid                    | 87.12  | 93.5   | 92.96  | 1.70-8.52  | 8.4  | 88.04  | 93.09  | 94.64  | 1.93-4.32  | 6.54 | 102.61 | 90.92  | 91.54  | 2.48-6.88 | 5.61  |
| 65 | Chromafenozide                | 86.87  | 95.07  | 94.93  | 2.73-2.85  | 2.49 | 92.23  | 96.28  | 94.28  | 2.31-4.75  | 1.95 | 102.86 | 97.4   | 96.64  | 2.20-5.58 | 4.55  |
| 66 | Tetrachlorantraniliprole      | 89.48  | 91.99  | 85.05  | 4.10-8.90  | 6.4  | 82.43  | 90.86  | 94.59  | 4.92-13.12 | 3.58 | 78.85  | 88.27  | 99.57  | 4.63-8.32 | 11.48 |

|    |                    |        |        |       |           |      |        |           |        |           |       |        |        |        |           |       |
|----|--------------------|--------|--------|-------|-----------|------|--------|-----------|--------|-----------|-------|--------|--------|--------|-----------|-------|
| 67 | Spirotetramat      | 95.22  | 96.18  | 94.19 | 1.70-2.90 | 2.97 | 98.24  | 96.31     | 93.4   | 2.1-4.07  | 2.4   | 108.68 | 93.67  | 99.12  | 3.90-4.12 | 3.62  |
| 68 | Epoxiconazole      | 89.8   | 89.16  | 93.07 | 1.91-4.84 | 7.71 | 93.53  | 89.56     | 96.54  | 1.84-6.41 | 2.25  | 99.05  | 94.64  | 93.22  | 3.04-3.94 | 4.34  |
| 69 | Furan Tebufenozide | 94.06  | 86.03  | 92.41 | 2.95-9.01 | 6.7  | 90.24  | 86.38     | 93.18  | 3.92-6.92 | 6.38  | 98.29  | 98.88  | 94.03  | 3.25-6.07 | 5.89  |
| 70 | Diclocymet         | 92.55  | 101.57 | 92.19 | 3.17-6.51 | 6.27 | 95.98  | 91.95     | 100.13 | 1.28-4.72 | 6.82  | 112.26 | 94.33  | 97.98  | 2.75-6.95 | 11.66 |
| 71 | Alachlor           | 87.51  | 92.3   | 93.69 | 0.93-4.75 | 3.57 | 92.68  | 95.194.03 | 94.71  | 1.03-4.61 | 7.56  | 101.43 | 94.22  | 96.34  | 3.53-6.26 | 6.59  |
| 72 | Tetraconazole      | 109.4  | 107.52 | 97.02 | 2.42-6.32 | 4.96 | 97.69  | 90.37     | 98.32  | 2.58-4.74 | 2.39  | 96.73  | 92.33  | 94.46  | 2.76-3.90 | 4.78  |
| 73 | Cyazofamid         | 94.15  | 106.25 | 97.01 | 2.92-3.94 | 3.94 | 101.93 | 94.51     | 96.5   | 1.05-6.84 | 4.42  | 97.56  | 91.24  | 93.9   | 2.46-3.85 | 3.98  |
| 74 | Fenoxanil          | 94.82  | 96.34  | 91.59 | 2.21-4.95 | 4.95 | 99.18  | 95.37     | 97.96  | 0.59-5    | 1.64  | 98.56  | 95.71  | 95.05  | 2.72-5.08 | 3.57  |
| 75 | Picoxystrobin      | 90.52  | 99.36  | 93.16 | 0.37-4.07 | 6.46 | 91.8   | 100.31    | 98.71  | 0.57-2.53 | 3.45  | 99.58  | 94.65  | 94.67  | 2.44-3.35 | 2.39  |
| 76 | Flusilazole        | 96.34  | 93.5   | 91.87 | 3.78-4.69 | 3.5  | 105.68 | 97.99     | 97.15  | 0.59-2.38 | 0.68  | 94.13  | 93.08  | 92.4   | 2.72-6.32 | 5.39  |
| 77 | Kresoxim-Methyl    | 99.34  | 97.71  | 96.69 | 1.37-2.18 | 4.73 | 89.3   | 92.79     | 94.91  | 2.77-4.58 | 5.27  | 102.39 | 98.6   | 96.1   | 2.55-2.85 | 3.18  |
| 78 | Fipronil           | 93.12  | 97.38  | 96.23 | 1.44-3.77 | 6.85 | 95.22  | 98.69     | 97.41  | 1.65-2.52 | 2.29  | 100.09 | 96.81  | 92.14  | 3.25-4.32 | 2.36  |
| 79 | Diazinon           | 94.42  | 96.59  | 95.97 | 1.94-7.37 | 6.96 | 96.6   | 95.54     | 98.29  | 0.52-4.31 | 4.1   | 102.61 | 94.05  | 93.37  | 2.72-3.74 | 3.5   |
| 80 | Brassinolide       | 73.27  | 76.79  | 73.45 | 2.35-6.35 | 5.03 | 96.89  | 114.32    | 102.8  | 3.58-7.28 | 15.03 | 76.73  | 77.23  | 79.16  | 4.49-5.93 | 7.97  |
| 81 | Tebuconazole       | 90.4   | 94.91  | 94.23 | 1.27-4.50 | 3.99 | 99.51  | 91.39     | 95.35  | 0.74-2.54 | 3.69  | 107.05 | 105.93 | 102.21 | 1.13-2.10 | 1.1   |
| 82 | Pentrimazole       | 92.41  | 94.81  | 89.83 | 2.89-3.56 | 3.11 | 84.75  | 94.72     | 96.09  | 0.72-7.56 | 3.47  | 99.03  | 94.54  | 94.75  | 2.39-2.72 | 2.73  |
| 83 | Pythiamin          | 92.54  | 95.02  | 90.49 | 1.81-4.25 | 3.48 | 97.37  | 96.41     | 92.23  | 1.28-2.75 | 4.08  | 102.2  | 92.54  | 94.87  | 1.84-2.87 | 1.87  |
| 84 | Propiconazole      | 93.17  | 95.79  | 93.59 | 1.59-3.27 | 3.91 | 86.85  | 93.75     | 92.05  | 1.27-5.3  | 3.49  | 100.47 | 95.19  | 96.32  | 3.99-6.07 | 6.26  |
| 85 | Pyraoxystrobin     | 88.35  | 93.55  | 92.26 | 1.34-3.58 | 5.28 | 97.21  | 95.86     | 93.63  | 0.9-2.51  | 0.82  | 104.67 | 91.77  | 93.28  | 2.37-2.81 | 2.83  |
| 86 | Pyraclostrobin     | 90.83  | 95.59  | 89.53 | 2.61-6.72 | 5.55 | 95.62  | 92.41     | 94.25  | 1.59-3.54 | 6.83  | 110.29 | 102.75 | 101.61 | 1.63-3.02 | 1.62  |
| 87 | Phoxim             | 85.98  | 97.94  | 93.41 | 1.06-3.63 | 3.16 | 96.9   | 94.56     | 94.35  | 1.86-4.52 | 1.86  | 101.58 | 93.26  | 94.78  | 206-2.92  | 2.94  |
| 88 | Cyflufenamid       | 102.28 | 88.77  | 91.09 | 0.80-3.56 | 3.48 | 91.25  | 94.9      | 96.31  | 1.31-4.41 | 1.81  | 114.41 | 102.66 | 107.65 | 3.50-4.03 | 4.03  |
| 89 | Diniconazole       | 91.27  | 89.39  | 94.38 | 2.58-2.97 | 4.16 | 93.63  | 90.25     | 94.93  | 2.56-4.36 | 3.81  | 101.57 | 92.15  | 93.08  | 2.42-4.37 | 3.27  |
| 90 | Ametoctradin       | 71.37  | 92.83  | 85.23 | 1.19-4.17 | 4.32 | 96.76  | 88.5      | 95.72  | 1.93-3    | 0.65  | 92.51  | 82.77  | 85.82  | 1.26-2.50 | 2.67  |
| 91 | Indoxacarb         | 97.72  | 89.39  | 95.12 | 2.14-4.66 | 4.57 | 94.27  | 93.66     | 92.72  | 2.81-5.73 | 10.55 | 106.74 | 90.64  | 96.55  | 2.99-7.25 | 7.1   |
| 92 | Pretilachlor       | 91.67  | 94.26  | 95.06 | 0.50-1.80 | 7.15 | 93.71  | 99.21     | 92.16  | 0.96-1.62 | 0.65  | 100.52 | 94.23  | 94.69  | 1.32-2.59 | 1.16  |



|     |                    |       |       |       |            |      |        |        |       |           |      |        |        |        |           |      |
|-----|--------------------|-------|-------|-------|------------|------|--------|--------|-------|-----------|------|--------|--------|--------|-----------|------|
| 93  | Difenoconazole     | 93.29 | 96.6  | 92.2  | 0.91-4.15  | 6.9  | 98.31  | 96.79  | 93.84 | 0.72-2.82 | 1.39 | 108.01 | 107.59 | 102.41 | 0.62-2.85 | 0.67 |
| 94  | Trifloxystrobin    | 93.7  | 92.82 | 89.95 | 1.09-4.42  | 3.6  | 93.06  | 94.82  | 95.44 | 1.57-2.8  | 1.74 | 101.93 | 93.22  | 94.63  | 1.51-2.57 | 2.02 |
| 95  | Profenofos         | 90.21 | 92.81 | 94.23 | 1.51-3.90  | 3.51 | 89.15  | 93.17  | 94.55 | 2.36-4.49 | 3.16 | 100.27 | 94.91  | 96.56  | 2.36-4.37 | 4.26 |
| 96  | Enestroburin       | 96.47 | 95.02 | 88.6  | 1.80-3.69  | 2.12 | 92.91  | 96.41  | 97.5  | 1.25-2.43 | 3.09 | 101.38 | 92.71  | 94.84  | 1.58-3.12 | 1.72 |
| 97  | Coumoxystrobin     | 94.56 | 92.71 | 84.05 | 0.74-2.24  | 1.21 | 107.85 | 101.07 | 91.02 | 1.53-5.33 | 4.82 | 102.72 | 93.91  | 96.06  | 1.57-2.94 | 2.63 |
| 98  | Buprofezin         | 87.99 | 89.67 | 84.09 | 1.95-2.92  | 1.73 | 91.52  | 98.37  | 91.61 | 1.2-2.53  | 3.39 | 100.71 | 94.78  | 95.59  | 1.65-4.10 | 2.1  |
| 99  | Emamectin Benzoate | 92.42 | 86.33 | 84.06 | 0.85-4.72  | 2.61 | 96.92  | 93.7   | 96.7  | 1.26-1.87 | 1.89 | 103    | 95.55  | 93.54  | 1.62-2.85 | 1.98 |
| 100 | Fenpropathrin      | 88.78 | 90.93 | 91.37 | 4.82-10.17 | 7.4  | 87.08  | 87.16  | 95.56 | 2.19-12.9 | 8.14 | 110.1  | 112.46 | 106.46 | 1.64-4.02 | 5.42 |
| 101 | Chlorpyrifos       | 94.59 | 96.89 | 86.67 | 0.70-3.59  | 2.15 | 94.77  | 99.23  | 96.11 | 1.24-2.96 | 2.55 | 104.08 | 106.67 | 103.44 | 1.91-2.40 | 2.58 |
| 102 | Hexythiazox        | 94.64 | 94.51 | 91.19 | 1.54-3.57  | 2.06 | 93.67  | 93.47  | 94.12 | 2.24-2.71 | 1.88 | 98.97  | 95.14  | 95.89  | 2.93-3.41 | 4.67 |
| 103 | Propargite         | 87.8  | 94.05 | 90.54 | 1.76-5.26  | 3.24 | 92.28  | 94.6   | 95.96 | 2.12-2.53 | 3.66 | 98.62  | 106.85 | 97.84  | 2.40-2.81 | 2.6  |
| 104 | Spirodiclofen      | 90.34 | 96.21 | 88.15 | 2.14-4.83  | 3.93 | 90.23  | 88.95  | 91.58 | 1.61-7.83 | 7.4  | 105.83 | 94.84  | 95.86  | 3.31-4.35 | 7.69 |
| 105 | Pyridaben          | 91.74 | 94.44 | 90    | 2.26-3.57  | 2.51 | 96.27  | 91.96  | 89.32 | 1.68-3.03 | 2    | 99.19  | 88     | 92.4   | 2.23-5.77 | 4.83 |
| 106 | Carbosulfan        | 86.82 | 81.21 | 77.51 | 4.89-7.37  | 5.42 | 30.25  | 30.97  | 32.87 | 1.32-7.97 | 7.87 | 48.33  | 43.47  | 44.69  | 2.02-2.98 | 5.19 |
| 107 | Etofenprox         | 97.65 | 97.14 | 97.29 | 1.99-4.18  | 5.87 | 97.94  | 87.65  | 95.5  | 1.8-3.03  | 3.26 | 95.92  | 89.3   | 95.27  | 3.39-4.41 | 4.93 |

**Table S7.** MRL of medicinal plants, *Fritillaria thunbergii* Miq, *Dendrobium officinale* Kimura et Migo, and Chrysanthemum in GB 2763-2021.

| Pesticide      | Medicinal plants<br>(mg/kg) | <i>Fritillaria thunbergii</i> Miq<br>(mg/kg) |     | <i>Dendrobium officinale</i> Kimura et Migo<br>(mg/kg) |     | Chrysanthemum<br>(mg/kg) |     |
|----------------|-----------------------------|----------------------------------------------|-----|--------------------------------------------------------|-----|--------------------------|-----|
|                |                             | Fresh                                        | Dry | Fresh                                                  | Dry | Fresh                    | Dry |
| Imidacloprid   | -                           | 0.05                                         | 0.2 | 2                                                      | 3   | 1                        | 2   |
| Thiamethoxam   | -                           | -                                            | -   | -                                                      | -   | 2                        | -   |
| Difenoconazole | -                           | -                                            | -   | 1                                                      | 2   | -                        | -   |
| Dimethomorph   | -                           | -                                            | -   | 20                                                     | 20  | -                        | -   |
| Acephate       | 0.05                        | -                                            | -   | -                                                      | -   | -                        | -   |
| Dimethoate     | 0.05                        | -                                            | -   | -                                                      | -   | -                        | -   |
| Carbofuran     | 0.02                        | -                                            | -   | -                                                      | -   | -                        | -   |
| Carbosulfan    | 0.02                        | -                                            | -   | -                                                      | -   | -                        | -   |

**Table S8.** Residual levels (mg/kg) of tested compounds in *Fritillaria thunbergii* Miq.

| Oringins                  | Panan | Panan | Taizhou | Jinhua | Jinhua | Lishui | Panan | Sichuan | Bozhou | Panan | Panan | Liuan | Panan | Anhui | Panan | Jinhua | Sichuan | Jinhua | Anhui | Jinhua |
|---------------------------|-------|-------|---------|--------|--------|--------|-------|---------|--------|-------|-------|-------|-------|-------|-------|--------|---------|--------|-------|--------|
| Samples NO.               | 1     | 2     | 3       | 4      | 5      | 6      | 7     | 8       | 9      | 10    | 11    | 12    | 13    | 14    | 15    | 16     | 17      | 18     | 19    | 20     |
| Pestiside                 |       |       |         |        |        |        |       |         |        |       |       |       |       |       |       |        |         |        |       |        |
| 3-Indoleacetic Acid       |       | 0.002 |         |        |        |        | 0.001 | 0.004   | 0.003  | 0.002 | 0.005 | 0.01  | 0.005 | 0.003 | 0.006 | 0.002  | 0.005   | 0.014  | 0.021 | 0.005  |
| Propamocarb               |       |       |         |        |        |        |       | 0.001   |        |       |       |       | 0.007 |       |       | 0.002  |         |        |       |        |
| Gibberellic Acid          |       | 0.001 |         |        |        |        |       | 0.005   | 0.004  | 0.005 | 0.002 | 0.004 | 0.008 | 0.011 | 0.009 | 0.007  | 0.009   | 0.004  | 0.004 | 0.002  |
| Sodium 5-Nitroguaiacolate | 0.001 |       |         | 0.001  |        | 0.001  |       | 0.004   |        |       |       | 0.001 |       |       | 0.001 | 0.001  | 0.001   | 0.001  | 0.005 | 0.001  |
| Sodium 2-Nitrophenolate   | 0.001 | 0.001 | 0.001   | 0.001  |        | 0.002  |       | 0.014   |        |       | 0.005 |       |       |       |       |        |         |        | 0.002 | 0.002  |
| Sodium 4-Nitrophenolate   |       |       |         |        |        | 0.003  |       | 0.003   |        |       | 0.004 |       |       |       |       | 0.001  | 0.001   | 0.001  |       |        |
| 2,4-D                     | 0.015 |       |         |        |        |        |       |         |        |       |       |       |       |       |       |        |         |        |       |        |
| Acetamiprid               |       | 0.001 | 0.001   |        | 0.001  |        |       |         |        |       | 0.001 |       |       |       |       |        |         |        |       |        |
| Carbendazim               | 0.061 | 0.029 | 0.001   | 0.001  | 0.049  | 0.005  | 0.001 | 0.028   |        |       | 0.023 | 0.001 | 0.028 | 0.003 | 0.02  | 0.004  | 0.02    | 0.031  | 0.194 | 0.024  |
| Tricyclazole              |       |       |         |        |        |        |       | 0.001   |        |       |       |       |       |       |       |        |         |        |       |        |
| 6-Benzylaminopurine       |       |       |         |        |        |        |       |         |        |       |       |       | 0.004 | 0.005 | 0.005 | 0.004  | 0.005   | 0.022  | 0.01  | 0.001  |
| Carbofuran                | 0.021 | 0.174 | 0.002   | 0.001  | 0.006  | 0.003  | 0.001 |         |        |       | 0.001 |       |       |       |       |        |         |        | 0.001 | 0.003  |
| Chlorantraniliprole       |       | 0.001 | 0.001   | 0.001  |        | 0.001  |       | 0.001   |        |       |       |       | 0.001 |       | 0.002 | 0.001  | 0.001   | 0.001  | 0.001 |        |
| Clomazone                 | 0.003 | 0.001 |         |        | 0.001  | 0.004  |       |         |        |       |       |       |       |       |       |        |         |        |       |        |
| Azoxystrobin              | 0.001 |       | 0.001   | 0.001  | 0.001  |        | 0.001 |         |        |       |       |       |       | 0.001 |       |        | 0.003   |        | 0.007 | 0.001  |
| Pyrimethanil              |       |       |         |        |        |        |       | 0.004   |        |       |       |       |       |       |       | 0.001  | 0.002   | 0.001  | 0.002 |        |
| Fenamidone                |       |       |         |        |        |        |       | 0.002   |        |       |       |       |       | 0.001 |       |        | 0.001   | 0.001  | 0.001 |        |
| Boscalid                  | 0.006 |       | 0.001   |        |        |        |       |         |        |       | 0.003 |       | 0.036 | 0.004 | 0.051 | 0.007  | 0.015   | 0.383  | 0.158 | 0.015  |
| Dimethomorph              |       |       |         |        | 0.002  |        |       | 0.003   |        |       |       |       |       |       |       |        |         |        | 0.001 |        |
| Isoprothiolane            |       |       |         |        |        |        |       |         |        |       |       |       |       |       |       |        |         |        | 0.001 |        |
| Fluopicolide              |       |       |         |        |        |        |       | 0.002   |        |       |       |       |       |       |       |        |         |        |       |        |
| Uniconazole               |       |       |         |        |        |        |       | 0.003   | 0.001  | 0.001 |       | 0.002 | 0.001 | 0.001 | 0.001 | 0.002  | 0.001   | 0.001  | 0.001 | 0.001  |

|                 |       |       |       |       |       |       |       |       |       |       |       |       |       |       |       |       |       |       |       |       |       |       |  |  |
|-----------------|-------|-------|-------|-------|-------|-------|-------|-------|-------|-------|-------|-------|-------|-------|-------|-------|-------|-------|-------|-------|-------|-------|--|--|
| Triadimefon     |       |       |       |       |       |       |       |       |       |       |       |       |       |       |       |       |       |       |       | 0.008 |       |       |  |  |
| Triazophos      | 0.001 |       |       |       |       |       |       |       | 0.001 | 0.002 | 0.002 | 0.002 | 0.001 | 0.001 | 0.002 | 0.001 | 0.002 | 0.001 | 0.001 | 0.001 |       |       |  |  |
| Chromafenozide  | 0.005 |       |       |       |       |       |       |       |       |       |       |       |       |       |       |       |       |       |       |       |       |       |  |  |
| Epoxiconazole   |       |       |       |       |       |       |       |       | 0.002 | 0.011 | 0.013 |       |       | 0.006 | 0.006 | 0.012 | 0.003 | 0.007 | 0.004 | 0.008 | 0.007 | 0.003 |  |  |
| Picoxystrobin   |       |       |       |       |       |       |       |       |       |       | 0.001 |       |       |       |       |       |       |       |       |       |       |       |  |  |
| Flusilazole     |       |       |       |       |       |       |       |       |       |       |       |       |       |       |       |       |       | 0.001 |       |       |       |       |  |  |
| Kresoxim-Methyl | 0.005 |       |       |       |       |       |       |       |       |       |       |       |       |       |       |       |       |       | 0.001 |       |       |       |  |  |
| Diazinon        |       |       |       |       |       |       |       |       |       |       |       |       |       |       |       |       |       | 0.001 | 0.001 | 0.001 |       |       |  |  |
| Tebuconazole    |       |       |       |       |       |       |       |       |       |       |       |       |       |       |       |       |       | 0.001 | 0.001 | 0.001 |       |       |  |  |
| Propiconazole   |       |       |       |       |       |       |       |       |       |       |       | 0.001 |       |       |       |       | 0.004 | 0.002 | 0.026 | 0.003 |       |       |  |  |
| Pyraclostrobin  | 0.004 | 0.003 | 0.004 | 0.004 | 0.004 | 0.003 | 0.003 | 0.003 | 0.003 | 0.003 | 0.004 | 0.003 | 0.003 | 0.011 | 0.003 | 0.003 | 0.01  | 0.032 | 0.084 | 0.009 |       |       |  |  |
| Phoxim          |       |       |       |       |       |       |       |       |       |       | 0.001 |       |       |       |       |       | 0.001 |       |       |       |       |       |  |  |
| Pretilachlor    | 0.001 |       |       |       |       | 0.007 |       |       |       |       |       |       |       |       |       |       |       |       |       |       |       |       |  |  |
| Difenoconazole  | 0.001 | 0.001 | 0.001 | 0.001 | 0.002 | 0.001 | 0.001 | 0.002 | 0.001 |       |       | 0.001 | 0.001 | 0.001 | 0.002 | 0.001 | 0.001 | 0.013 | 0.015 | 0.083 | 0.004 |       |  |  |
| Trifloxystrobin | 0.001 | 0.001 | 0.001 | 0.001 | 0.001 | 0.001 | 0.001 | 0.001 | 0.001 | 0.001 | 0.001 | 0.001 | 0.001 |       |       | 0.001 | 0.001 | 0.001 |       |       | 0.002 | 0.001 |  |  |
| Fenpropathrin   | 0.001 |       |       |       | 0.002 |       |       | 0.003 |       |       | 0.004 |       |       | 0.001 | 0.001 |       |       | 0.001 |       |       | 0.002 | 0.001 |  |  |
| Chlorpyrifos    | 0.001 | 0.001 | 0.001 | 0.002 | 0.001 | 0.003 | 0.001 | 0.004 | 0.001 | 0.001 | 0.001 | 0.001 |       |       | 0.001 | 0.001 | 0.001 | 0.001 | 0.001 | 0.001 | 0.003 | 0.001 |  |  |
| Bifenthrin      |       |       |       |       |       | 0.001 |       |       |       |       |       |       |       | 0.001 |       |       |       | 0.001 | 0.005 | 0.005 | 0.004 | 0.001 |  |  |

**Table S9.** Residual levels (mg/kg) of tested compounds in *Chrysanthemum Morifolium* Ramat.

| Oringins                      | Tongx<br>iang | Tongxi<br>ang |
|-------------------------------|---------------|---------------|---------------|---------------|---------------|---------------|---------------|---------------|---------------|---------------|---------------|---------------|---------------|---------------|---------------|---------------|---------------|---------------|---------------|---------------|
| Samples NO.<br>Pestiside      | 1             | 2             | 3             | 4             | 5             | 6             | 7             | 8             | 9             | 10            | 11            | 12            | 13            | 14            | 15            | 16            | 17            | 18            | 19            | 20            |
| 3-Indoleacetic Acid           | 0.138         | 0.181         | 0.205         | 0.117         | 0.129         | 0.187         | 0.245         | 0.166         | 0.151         | 0.126         | 0.231         | 0.137         | 0.195         | 0.198         | 0.134         | 0.217         | 0.205         | 0.279         | 0.172         | 0.2           |
| Dinotefuran                   |               | 0.085         |               |               |               |               | 0.033         |               | 0.175         |               |               |               | 0.748         | 0.014         |               | 0.015         | 0.046         |               | 0.046         | 0.006         |
| Propamocarb                   | 0.006         | 0.009         |               | 0.009         |               |               | 0.024         | 0.042         | 0.006         |               |               | 0.007         | 0.061         | 0.008         |               | 0.032         | 0.01          |               |               |               |
| Methomyl                      |               | 0.014         |               |               | 0.014         | 0.017         | 0.226         | 0.013         |               |               |               |               | 0.017         |               |               |               | 0.015         |               |               |               |
| Thiamethoxam                  | 0.033         | 0.044         | 0.025         | 0.02          | 0.043         | 0.016         | 0.382         | 0.144         | 0.293         | 0.274         | 0.038         | 0.49          | 0.143         | 0.203         | 0.011         | 0.129         | 0.204         | 0.011         | 0.543         | 0.042         |
| Gibberellic Acid              | 1.229         | 0.871         | 0.257         | 0.629         | 0.877         | 0.926         | 0.74          | 1.182         | 1.09          | 0.778         | 1.099         | 0.722         | 0.693         | 0.519         | 0.548         | 0.988         | 0.461         | 1.179         | 2.386         | 0.29          |
| Clothianidin                  | 0.039         | 0.097         | 0.177         | 0.023         | 0.02          | 0.036         | 0.139         | 0.117         | 0.1           | 0.029         | 0.104         | 0.036         | 0.094         | 0.128         | 0.008         | 0.143         | 0.319         | 0.021         | 0.203         | 0.107         |
| Imidacloprid                  | 0.566         | 0.488         | 0.096         |               | 1.3           | 0.634         | 0.305         | 0.221         | 0.396         | 0.051         | 0.152         |               | 0.27          | 0.407         | 0.489         | 0.526         | 1.299         | 0.092         | 0.344         | 0.132         |
| Trichlorfon                   |               |               |               |               |               | 0.005         |               | 0.004         |               | 0.007         | 0.005         |               | 0.015         |               | 0.005         |               | 0.003         | 0.004         | 0.005         |               |
| 3-<br>Hydroxycarbofuran       | 0.02          | 0.021         | 0.014         |               |               |               | 0.038         |               |               |               | 0.019         |               |               | 0.016         | 0.017         | 0.035         | 0.015         |               |               |               |
| Sodium 5-<br>Nitroguaiacolate |               | 0.003         | 0.001         | 0.012         |               | 0.006         | 0.004         |               |               |               | 0.003         | 0.009         | 0.006         | 0.001         | 0.006         | 0.006         | 0.004         | 0.032         | 0.024         | 0.005         |
| Sodium 2-<br>Nitrophenolate   | 0.007         | 0.005         | 0.009         | 0.016         | 0.013         | 0.014         | 0.008         | 0.007         | 0.009         | 0.021         | 0.011         | 0.015         | 0.008         | 0.009         | 0.017         | 0.009         | 0.012         | 0.239         | 0.031         | 0.011         |
| Sodium 4-<br>Nitrophenolate   | 0.009         | 0.007         | 0.008         | 0.017         | 0.012         | 0.012         | 0.007         | 0.007         | 0.001         | 0.019         | 0.008         | 0.012         | 0.006         | 0.006         | 0.016         | 0.008         | 0.012         | 0.225         | 0.032         | 0.009         |
| 2,4-D                         | 0.015         | 0.026         | 0.086         | 0.017         |               |               | 0.006         | 0.019         |               | 0.031         | 0.014         |               |               |               | 0.007         | 0.031         | 0.021         |               | 0.005         | 0.05          |
| Dimethoate                    | 0.003         | 0.004         |               |               |               | 0.004         | 0.006         |               |               |               | 0.012         |               | 0.003         |               | 0.002         | 0.008         | 0.003         |               |               | 0.001         |
| Acetamiprid                   | 0.497         | 0.812         | 0.027         | 0.018         | 0.111         | 0.039         | 0.178         | 0.127         | 0.124         | 0.005         | 0.152         | 0.004         | 0.135         | 0.748         | 0.03          | 0.63          | 0.938         | 0.004         | 0.104         | 0.047         |
| Carbendazim                   | 0.67          | 1.67          | 0.034         | 0.075         | 0.182         | 1.646         | 0.257         | 0.399         | 0.311         | 0.051         | 0.02          | 0.013         | 0.337         | 0.56          | 0.717         | 1.004         | 1.059         | 0.015         | 0.011         | 0.041         |

|                      |       |       |       |       |       |       |       |       |       |       |       |       |       |       |       |       |       |       |       |       |
|----------------------|-------|-------|-------|-------|-------|-------|-------|-------|-------|-------|-------|-------|-------|-------|-------|-------|-------|-------|-------|-------|
| Thiacloprid          | 0.004 | 0.007 |       |       | 0.005 | 0.006 |       | 0.067 | 0.003 | 0.005 | 0.009 |       |       | 0.003 | 0.003 | 0.004 |       | 0.003 |       | 0.007 |
| Trinexapac-Ethyl     |       |       |       | 0.071 |       | 0.07  | 0.058 |       | 0.056 | 0.056 | 0.055 |       |       |       | 0.056 | 0.076 | 0.08  |       | 0.145 |       |
| Tricyclazole         | 0.033 | 0.125 | 0.021 | 0.013 | 0.013 | 0.019 | 0.187 | 0.065 | 0.262 | 0.014 | 0.245 | 0.013 | 2.683 | 0.074 | 0.013 | 0.309 | 0.113 | 0.013 | 0.014 | 0.045 |
| Indolbutyric Acid    | 0.005 | 0.006 | 0.005 | 0.006 | 0.01  | 0.009 | 0.008 | 0.006 | 0.005 | 0.007 | 0.007 | 0.006 | 0.011 | 0.008 | 0.007 | 0.007 | 0.008 |       |       | 0.006 |
| 6-                   |       |       |       |       |       |       |       |       |       |       |       |       |       |       |       |       |       |       |       |       |
| Benzylaminopurine    | 0.008 | 0.006 |       | 0.008 | 0.001 | 0.002 | 0.009 | 0.009 | 0.008 | 0.001 | 0.001 | 0.006 | 0.008 | 0.008 |       | 0.009 | 0.009 |       |       | 0.001 |
| Carbofuran           | 0.029 | 0.016 | 0.012 |       |       |       | 0.051 | 0.011 | 0.011 |       | 0.021 |       | 0.025 | 0.016 | 0.02  | 0.096 | 0.017 |       |       | 0.01  |
| Forchlorfenuron      |       | 0.01  | 0.11  |       | 0.025 | 0.057 |       | 0.023 | 0.017 | 0.013 | 0.159 |       |       | 0.013 |       |       |       | 0.363 | 0.012 | 0.099 |
| Isopropyl            | 0.01  | 0.042 | 0.01  |       | 0.003 | 0.004 | 0.069 | 0.179 | 0.174 |       | 0.008 |       | 0.042 | 0.04  |       | 0.085 | 0.05  |       | 0.019 | 0.006 |
| Chlorantraniliprole  | 0.024 | 0.021 | 0.018 | 0.001 | 0.002 | 0.002 | 0.004 | 0.047 | 0.034 | 0.002 | 0.009 | 0.002 | 0.006 | 0.011 |       | 0.184 | 0.065 | 0.003 | 0.133 | 0.04  |
| Azoxystrobin         | 0.064 | 2.362 | 0.098 |       | 5.025 | 0.693 | 0.876 | 1.138 | 0.132 | 0.022 | 0.099 |       | 0.285 | 0.111 | 2.565 | 0.441 | 0.235 |       | 0.075 | 0.115 |
| Methyl Jasmonate     | 0.095 | 0.157 | 0.22  | 0.006 | 0.417 | 0.415 | 0.086 | 0.25  | 0.112 | 0.057 | 0.948 | 0.005 | 0.044 | 0.069 | 0.019 | 0.045 | 0.043 | 0.009 | 0.607 | 0.181 |
| Pyrimethanil         | 0.005 | 0.009 | 0.004 | 0.002 | 0.011 | 0.004 | 0.13  | 0.005 | 0.005 | 0.003 | 0.005 | 0.001 | 0.004 | 0.005 | 0.002 | 0.135 | 0.004 |       | 0.062 | 0.002 |
| Boscalid             |       |       |       |       |       |       |       |       |       |       |       |       |       |       |       |       |       |       | 1.295 |       |
| Dimethomorph         |       |       | 0.042 |       |       |       | 0.082 | 0.225 | 0.014 |       |       | 0.019 | 0.115 | 0.12  | 0.005 | 0.038 | 0.015 | 0.003 | 0.043 | 0.019 |
| Mandipropamid        | 0.004 | 0.004 | 0.004 | 0.004 | 0.004 |       |       |       |       |       |       |       |       |       | 0.004 |       |       |       |       |       |
| Isoprothiolane       | 0.495 | 0.284 | 0.034 | 0.109 | 1.08  | 0.822 | 0.816 | 1.347 | 0.365 | 0.561 | 0.05  | 0.097 | 0.348 | 0.414 | 0.399 | 0.389 | 0.47  |       | 0.119 | 0.049 |
| Fluopicolide         | 0.063 | 0.064 | 0.016 | 0.058 | 0.02  | 0.022 | 0.082 | 0.069 | 0.065 | 0.02  | 0.019 | 0.053 | 0.141 | 0.061 | 0.019 | 0.083 | 0.069 | 0.011 |       | 0.02  |
| Paclobutrazol        | 0.001 | 0.015 | 0.003 | 0.001 |       |       | 0.002 | 0.003 | 0.002 |       | 0.009 |       | 0.015 | 0.002 | 0.001 | 0.003 | 0.002 |       | 0.057 | 0.005 |
| Malathion            | 0.228 | 0.304 | 0.248 | 0.268 | 0.187 | 0.226 | 0.248 | 0.249 | 0.25  | 0.234 | 0.226 | 0.274 | 0.406 | 0.323 | 0.295 | 0.287 | 0.427 | 0.226 | 0.283 | 0.281 |
| Triadimefon          | 0.017 | 0.027 | 0.006 |       |       | 0.027 | 0.011 | 0.049 | 0.024 | 0.025 | 0.024 |       | 0.063 | 0.063 |       | 0.165 | 0.388 |       |       |       |
| Triazophos           |       |       |       |       | 0.03  |       |       | 0.011 |       |       |       |       | 0.012 | 0.009 |       | 0.009 | 0.012 |       |       |       |
| Tetrachlorantranilip |       |       |       |       |       |       |       |       |       |       |       |       |       |       |       |       |       |       |       |       |
| role                 | 0.014 | 0.005 |       |       | 0.011 |       | 0.004 | 0.012 |       |       | 0.061 |       | 0.043 | 0.03  |       | 0.024 | 0.006 | 0.001 |       |       |
| Spirotetramat        |       |       |       |       |       |       |       |       |       |       |       |       |       |       |       |       |       |       | 0.071 |       |
| Tetraconazole        |       |       |       |       |       |       |       |       |       |       |       |       | 0.024 |       |       |       |       |       |       |       |

|                 |       |       |       |       |       |       |       |       |       |       |       |       |       |       |       |       |       |       |       |       |
|-----------------|-------|-------|-------|-------|-------|-------|-------|-------|-------|-------|-------|-------|-------|-------|-------|-------|-------|-------|-------|-------|
| Cyazofamid      | 0.046 | 0.083 | 0.019 |       |       |       | 0.084 | 0.058 | 0.069 | 0.009 | 0.044 |       | 0.099 | 0.051 |       | 0.16  | 0.083 |       | 0.021 |       |
| Flusilazole     | 0.065 | 0.1   | 0.164 | 0.04  | 0.377 | 0.423 | 0.083 | 0.101 | 0.082 | 0.303 | 0.271 | 0.034 | 0.129 | 0.061 | 0.219 | 0.079 | 0.058 | 0.004 | 0.007 | 0.142 |
| Kresoxim-Methyl |       | 0.022 |       |       |       |       | 0.015 | 0.256 |       |       |       |       | 0.012 |       |       | 0.03  | 0.016 |       |       |       |
| Fipronil        | 0.067 | 0.065 | 0.057 | 0.003 | 0.022 | 0.024 | 0.072 | 0.183 | 0.086 | 0.007 | 0.091 |       | 0.191 | 0.068 | 0.003 | 0.092 | 0.117 | 0.003 | 0.003 | 0.052 |
| Diazinon        | 0.01  | 0.011 | 0.003 | 0.007 | 0.002 | 0.002 | 0.011 | 0.015 | 0.01  |       |       | 0.005 | 0.012 | 0.01  |       | 0.011 | 0.01  |       |       | 0.002 |
| Tebuconazole    | 0.227 | 0.375 | 0.245 | 0.106 | 0.049 |       | 0.089 | 0.112 | 0.183 | 0.001 | 0.12  | 1.77  | 0.306 | 0.152 | 0.008 | 0.124 | 0.963 | 0.416 | 0.003 | 0.121 |
| Pythiamin       | 0.001 | 0.001 | 0.002 | 0.001 | 0.002 | 0.002 | 0.001 | 0.001 | 0.001 | 0.002 | 0.003 | 0.001 | 0.001 | 0.001 | 0.001 | 0.001 | 0.001 |       | 0.001 | 0.002 |
| Propiconazole   |       | 0.035 | 0.014 |       | 0.029 | 0.049 | 0.08  | 0.175 | 0.042 |       | 0.095 |       | 0.26  | 0.018 |       | 0.051 | 0.017 |       |       | 0.012 |
| Pyraclostrobin  | 0.067 | 0.076 | 0.169 | 0.164 | 0.002 | 0.021 | 0.161 | 0.308 | 0.043 | 0.008 | 0.191 | 1.507 | 0.102 | 0.07  | 0.089 | 0.123 | 0.286 | 0.804 | 0.019 | 0.037 |
| Phoxim          | 0.049 | 0.252 | 0.085 | 0.003 | 0.016 | 0.009 | 0.18  | 0.115 | 0.058 |       | 0.073 | 0.002 | 0.042 | 0.048 |       | 0.172 | 0.041 | 0.012 |       | 0.073 |
| Diniconazole    | 0.042 | 0.042 |       | 0.032 | 0.044 | 0.049 | 0.046 | 0.056 | 0.045 | 0.025 | 0.05  | 0.029 | 0.066 | 0.043 | 0.051 | 0.049 | 0.039 |       | 0.003 | 0.009 |
| Indoxacarb      | 0.122 | 0.507 | 0.012 | 0.003 | 0.012 | 0.005 | 0.067 | 0.014 | 0.301 | 0.007 | 0.032 | 0.006 | 0.366 | 0.167 | 0.006 | 0.102 | 0.186 |       | 0.21  | 0.025 |
| Pretilachlor    | 0.004 | 0.003 | 0.086 | 0.001 |       |       | 0.006 | 0.007 | 0.008 |       |       | 0.001 | 0.007 | 0.004 |       | 0.006 | 0.004 |       |       | 0.08  |
| Difenoconazole  | 0.059 | 0.362 | 0.06  | 0.072 | 0.891 | 0.174 | 0.807 | 1.184 | 0.177 | 0.003 | 0.219 | 0.034 | 0.953 | 0.111 | 0.068 | 0.755 | 0.321 | 0.004 | 0.132 | 0.099 |
| Trifloxystrobin | 0.059 | 0.362 | 0.06  | 0.072 | 0.891 | 0.174 | 0.807 | 1.184 | 0.177 | 0.003 | 0.219 | 0.034 | 0.953 | 0.111 | 0.068 | 0.755 | 0.321 | 0.004 | 0.132 | 0.099 |
| Profenofos      | 0.069 | 0.016 | 0.011 |       | 0.009 | 0.013 | 0.04  | 0.017 | 0.043 |       | 0.239 |       | 0.035 | 0.022 |       | 0.011 | 0.03  |       |       | 0.015 |
| Buprofezin      | 0.008 | 0.067 | 0.017 | 0.008 | 0.008 | 0.013 | 0.064 | 0.067 | 0.028 | 0.007 | 0.007 | 0.009 | 0.246 | 0.117 | 0.008 | 0.027 | 0.069 | 0.006 | 0.036 | 0.01  |
| Emamectin       |       |       |       |       |       |       |       |       |       |       |       |       |       |       |       |       |       |       |       |       |
| Benzoate        | 0.02  | 0.025 | 0.003 | 0.002 | 0.004 | 0.004 | 0.009 | 0.021 | 0.006 | 0.002 | 0.004 | 0.105 | 0.026 | 0.018 | 0.002 | 0.012 | 0.025 | 0.004 | 0.003 | 0.005 |
| Fenpropathrin   | 0.042 | 0.721 | 0.289 | 0.669 | 0.071 |       | 0.855 | 0.403 | 0.173 | 0.009 | 0.445 | 0.282 | 0.781 | 0.407 | 0.102 | 0.213 | 1.007 | 1.278 |       | 0.34  |
| Chlorpyrifos    | 0.024 | 0.597 | 0.211 | 0.646 | 0.077 | 0.014 | 0.834 | 0.371 | 0.164 | 0.009 | 0.386 | 0.259 | 0.815 | 0.407 | 0.063 | 0.223 | 1.19  | 1.458 | 0.003 | 0.371 |
| Propargite      |       |       |       |       |       |       | 0.006 |       |       |       |       |       | 0.010 |       |       |       |       |       |       | 0.005 |
| Pyridaben       | 0.023 | 0.019 |       | 0.013 |       |       | 0.013 | 0.011 | 0.01  |       | 0.008 | 0.018 | 0.012 | 0.011 |       | 0.013 | 0.011 |       |       | 0.011 |
| Carbosulfan     |       |       |       |       |       |       | 0.003 |       | 0.001 |       | 0.001 |       | 0.003 |       | 0.004 | 0.034 | 0.001 |       |       |       |
| Etofenprox      |       | 0.003 |       |       | 0.007 |       | 0.001 |       |       |       | 0.001 |       |       | 0.005 |       | 0.001 |       |       |       |       |
| Bifenthrin      | 0.006 | 0.026 | 0.005 | 0.002 |       | 0.006 | 0.019 | 0.03  | 0.048 |       | 0.007 | 0.031 | 0.005 | 0.071 | 0.002 | 0.03  | 0.026 | 0.002 | 0.825 | 0.009 |

**Table S10.** Residual levels (mg/kg) of tested compounds in *Dendrobium officinale* Kimura et Migo.

| Oringins                | Yunnan | Jinhua | Jinhua | Panan | Jinhua | Panan | Panan | Guangxi | Guangxi | Anhui | Huoshan | Jinhua | Panan | Panan | Panan | Panan | Panan | Panan | Yunnan | Yunnan |
|-------------------------|--------|--------|--------|-------|--------|-------|-------|---------|---------|-------|---------|--------|-------|-------|-------|-------|-------|-------|--------|--------|
| Samples NO.             | 1      | 2      | 3      | 4     | 5      | 6     | 7     | 8       | 9       | 10    | 11      | 12     | 13    | 14    | 15    | 16    | 17    | 18    | 19     | 20     |
| Pestiside               |        |        |        |       |        |       |       |         |         |       |         |        |       |       |       |       |       |       |        |        |
| 3-Indoleacetic Acid     | 0.003  | 0.004  | 0.002  | 0.004 | 0.002  | 0.006 | 0.008 | 0.006   | 0.007   | 0.017 | 0.013   | 0.01   | 0.004 | 0.003 | 0.009 | 0.001 | 0.008 | 0.002 | 0.002  | 0.005  |
| Propamocarb             |        |        |        | 0.486 | 1.95   | 0.004 |       |         |         |       |         |        |       |       |       |       |       |       | 5.715  | 0.003  |
| Gibberellic Acid        | 0.050  | 0.147  | 0.132  | 0.134 | 0.433  | 0.233 | 0.208 | 0.221   | 0.125   | 0.182 | 0.102   | 0.021  | 0.110 | 0.102 | 0.108 | 0.138 | 0.104 | 0.115 | 0.040  | 0.028  |
| Clothianidin            |        |        |        |       |        |       |       |         |         |       |         |        |       |       |       |       |       |       | 0.015  | 0.008  |
| Imidacloprid            |        |        |        | 0.002 |        |       | 0.005 |         | 0.001   |       | 0.001   |        | 0.001 |       |       |       |       |       |        |        |
| Sodium 2-Nitrophenolate |        |        |        |       |        | 0.002 |       | 0.005   |         | 0.002 | 0.003   |        |       |       |       |       |       |       |        |        |
| Sodium 4-Nitrophenolate |        |        |        |       |        |       |       | 0.004   | 0.002   | 0.002 | 0.004   | 0.002  | 0.002 | 0.002 | 0.002 | 0.001 | 0.001 |       | 0.003  | 0.002  |
| Acetamiprid             |        |        |        |       |        |       |       |         |         |       |         |        |       |       |       |       |       |       | 0.001  |        |
| Carbendazim             |        |        |        |       |        |       | 0.016 | 0.002   | 0.003   | 0.016 | 0.054   | 0.002  | 0.005 |       |       | 0.002 |       |       | 0.003  | 0.007  |
| Thiacloprid             |        |        |        | 0.001 |        |       |       |         |         |       |         |        |       |       |       |       |       |       |        |        |
| Tricyclazole            |        |        |        |       |        |       |       |         |         |       |         |        |       |       |       |       |       |       | 0.001  |        |
| Chlorantraniliprole     | 0.001  | 0.007  | 0.001  |       | 0.003  |       | 0.038 |         |         | 0.005 | 0.004   | 0.003  | 0.001 | 0.008 |       | 0.001 | 0.001 | 0.003 | 0.13   | 0.004  |
| Azoxystrobin            |        |        |        | 0.005 | 0.001  |       | 0.047 |         | 0.001   |       | 0.012   |        |       |       |       |       |       |       | 0.143  | 0.004  |
| Pirimethanil            |        |        |        |       |        | 0.015 |       |         | 0.01    |       |         |        | 0.002 |       |       | 0.003 |       |       |        |        |
| Boscalid                |        |        |        |       |        |       |       |         |         |       |         |        |       |       |       | 0.002 |       |       |        | 2.09   |
| Fluopicolide            |        |        |        | 0.061 | 0.175  | 0.002 |       |         |         |       | 0.001   | 0.001  | 0.001 | 0.001 | 0.001 | 0.001 | 0.001 | 0.001 | 1.005  | 0.005  |



|                          |       |       |       |       |       |       |       |       |       |       |       |       |       |       |       |       |       |
|--------------------------|-------|-------|-------|-------|-------|-------|-------|-------|-------|-------|-------|-------|-------|-------|-------|-------|-------|
| Paclobutrazol            |       |       |       |       |       |       |       |       |       |       |       |       |       |       |       |       | 0.005 |
| Triadimefon              |       |       |       |       |       |       |       |       |       |       |       |       |       |       |       |       | 0.135 |
| Tetrachlorantraniliprole |       |       |       |       |       |       |       |       |       |       |       |       |       |       |       |       | 0.022 |
| Picoxystrobin            |       |       |       |       |       |       |       |       | 0.01  |       |       |       |       |       |       |       |       |
| Flusilazole              |       |       |       |       |       |       |       |       | 0.002 |       |       |       |       |       |       |       |       |
| Tebuconazole             |       |       |       |       | 1.766 | 0.001 | 0.009 |       | 0.371 |       |       | 0.001 |       |       |       | 0.526 | 0.006 |
| Pyraclostrobin           |       |       | 0.001 | 0.438 | 0.001 | 0.001 | 0.002 | 0.144 | 0.002 | 0.002 | 0.002 | 0.006 | 0.002 | 0.004 | 0.002 | 0.002 | 0.585 |
| Phoxim                   |       |       |       |       |       |       | 0.01  |       |       |       |       |       |       |       |       |       |       |
| Indoxacarb               |       |       | 0.017 |       |       |       |       |       |       |       |       |       |       |       |       |       |       |
| Difenoconazole           |       | 0.006 | 0.014 | 0.002 | 0.007 |       |       |       | 0.006 | 0.001 |       |       |       |       |       | 0.001 | 0.003 |
| Trifloxystrobin          |       |       |       | 0.001 |       | 0.006 |       | 0.001 | 0.001 | 0.001 | 0.001 | 0.001 | 0.001 | 0.001 | 0.001 | 0.001 | 0.001 |
| Profenofos               |       |       |       |       |       |       |       |       |       |       |       |       |       |       |       |       | 0.002 |
| Buprofezin               | 0.001 | 0.002 | 0.001 | 0.002 | 0.002 | 0.002 | 0.002 | 0.002 | 0.002 | 0.002 | 0.001 | 0.001 | 0.001 | 0.002 | 0.001 | 0.002 | 0.002 |
| Fenpropathrin            |       |       |       |       |       |       | 0.002 |       |       |       |       |       |       |       |       |       | 0.003 |
| Chlorpyrifos             |       |       |       |       |       |       | 0.002 |       |       |       |       |       |       |       |       |       | 0.003 |
| Pyridaben                |       |       | 0.004 | 0.003 |       |       |       |       | 0.005 | 0.003 |       |       |       |       |       |       |       |
